# Supplementary material for: ROCK signaling promotes collagen remodeling to facilitate invasive pancreatic ductal adenocarcinoma tumor cell growth
Source: PubMed Central journal article supplement (PMC5286371; doi:10.15252/emmm.201606743), 2016-12-28
Supplement: EMMM-9-198-s001.pdf [file EMMM-9-198-s001.pdf]

## **Appendix - ROCK signaling promotes collagen remodeling to facilitate invasive pancreatic ductal adenocarcinoma tumor cell growth.**

Nicola Rath, Jennifer P Morton, Linda Julian, Lena Helbig, Shereen Kadir, Ewan J McGhee, Kurt I Anderson, Gabriela Kalna, Margaret Mullin, Andreia V Pinho, Ilse Rooman, Michael S Samuel, Michael F Olson

### **Table of contents**

#### **Appendix Supplementary Methods**

- Primary pancreatic exocrine cultures
- Attachment assay

#### **Appendix Supplementary Figures**

- Appendix Figure S1 - ROCK2 expression in mouse pancreata
- Appendix Figure S2 - Tissue selective expression of conditionally-regulated ROCK2
- Appendix Figure S3 - Conditional ROCK activation in KC mice does not alter PanIN numbers
- Appendix Figure S4 - Invasion of KPC or KPfIC cells into fibroblast conditioned collagen
- Appendix Figure S5 - ROCK-induced substrate phosphorylation and changes in cell morphology
- Appendix Figure S6 - Average RNA sequence reads for indicated collagens with >10 copies detected
- Appendix Figure S7 - Analysis of KPC mouse tumors with Fasudil ROCK inhibitor treatment

#### **Tables Supplementary Tables**

- Supplementary Table S1 - ROCK-induced changes in gene expression associated with Metacore<sup>TM</sup> gene process networks
- Supplementary Table S2 - RNA sequencing reads for Mmp and Timp transcripts
- Supplementary Table S3 - RNA sequencing reads for collagen transcripts
- Supplementary Table S4 - Clinical information data provided by US Biomax for Pancreas cancer tissue array (PA961c)

### **References**

## **Appendix Supplementary Methods**

### **Primary pancreatic exocrine cultures**

Pancreatic exocrine cells were isolated as previously described (Pinho *et al*, 2011). Pancreata were injected with 2.5 ml of a 1.25 mg/ml Collagenase P (Roche)/HBSS (Gibco) solution and after removal from the mouse, placed into 5 ml of Collagenase P/HBSS solution. The tissue was cut into small pieces and digested in a shaking water bath at 37°C for 20 min. The reaction was stopped by placing the solution on ice. 10 ml cold HBSS + 5% FBS was added and after sedimentation of the cellular fraction, the supernatant was aspirated. Cell pellets were washed three times with 10 ml HBSS + 5% FBS. The cell suspension was centrifuged twice for 2 min at 1000 rpm and then the cell suspension was filtered sequentially through a 500 µm polypropylene mesh (Spectrum laboratories) and a 100 µm nylon filter (BD Falcon). Next, the cell suspension was layered on top of a 20 ml HBSS + 30% FBS solution and viable acinar cells pelleted by centrifugation for 2 min at 1000 rpm. Cells were cultured in defined media: DMEM/F12 supplemented with 3% FBS (Sigma), 1 mM Pyruvate (Gibco), 1x Non-essential amino acids (Gibco), 1x N2 supplement (Gibco), 0.5x B27 supplement (Gibco), 0.1% β-mercaptoethanol (Gibco), 20 ng/ml EGF (R&D systems), 10<sup>3</sup> U/mL Esgro mLIF (Millipore), 25 µg/ml G418 (10131-027, Gibco), 0.1 mg/ml Soybean Trypsin Inhibitor (T6522, Sigma), and antibiotics (Penicillin-Streptomycin, 15070-063, Gibco) (Pinho *et al*, 2011). As indicated, EtOH vehicle, 2 µM 4HT or 10 µM Y27632 were added to the medium.

### **Attachment assay**

Primary exocrine cells were seeded into 24-well plates and allowed to attach over a period of 48 h. Attachment of primary acinar cells was measured using the

Sulforhodamine B (SRB) assay. Cells were fixed to tissue culture plates with 1% trichloroacetic acid, stained with 0.4% SRB/1% glacial acetic acid for 45 min, and then washed 4 times with 1% acetic acid. Plates were left to dry overnight. Next day, 500  $\mu$ l of 10 mM Tris Base was added to each well and plates were left on a shaker for 15 min. For *Pdx1-Cre; LSL-KRas<sup>G12D/+</sup>* primary cultures 75  $\mu$ l and for *Pdx1-Cre* and *Pdx1-Cre; LSL-ROCK2:ER* primary cultures 100  $\mu$ l were transferred to a 96-well-plate and absorbance was measured at 570 nm in triplicate.

**Appendix Figure S1 - ROCK2 expression in mouse pancreata (related to Fig 1).**

A Validation of ROCK2 antibody specificity using serial sections of pancreatic tissue from *Pdx1-Cre; Rosa26-LSL-RFP; ROCK2<sup>fl/fl</sup>* mice. Serial tissue sections were immunohistochemically stained for RFP or ROCK2. Images reveal mosaic activity of the Pdx1-Cre recombinase as indicated by RFP expression. The ROCK2 antibody stained RFP negative cells that had not recombined the *ROCK2<sup>fl/fl</sup>* locus. Scale bar = 100  $\mu$ m.

B *Pdx1-Cre; Rosa26-LSL-RFP; ROCK2<sup>fl/fl</sup>* cohorts were aged for 25 weeks. No significant effect of Pdx1-Cre mediated ROCK2 deletion was observed by comparing ROCK2<sup>+/+</sup>, ROCK2<sup>+/fl</sup> and ROCK2<sup>fl/fl</sup> mice for body weight or pancreas/body weight, for males or females. Scatter plots show means  $\pm$  SD (n=6-15), p-values determined by Kruskal-Wallis test.

**A**

RFP

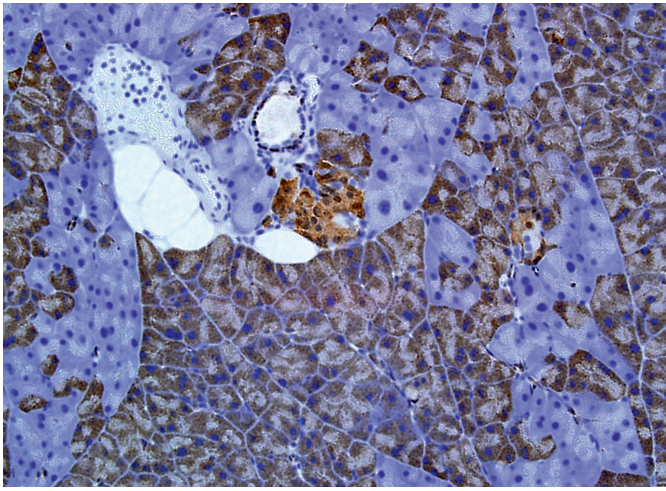

ROCK2

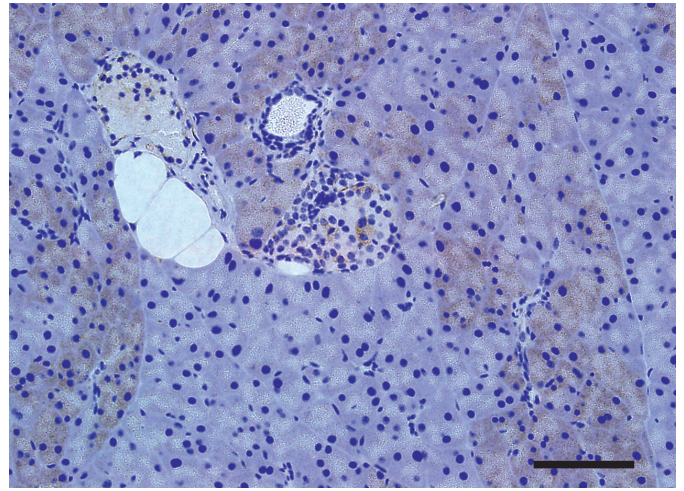**B**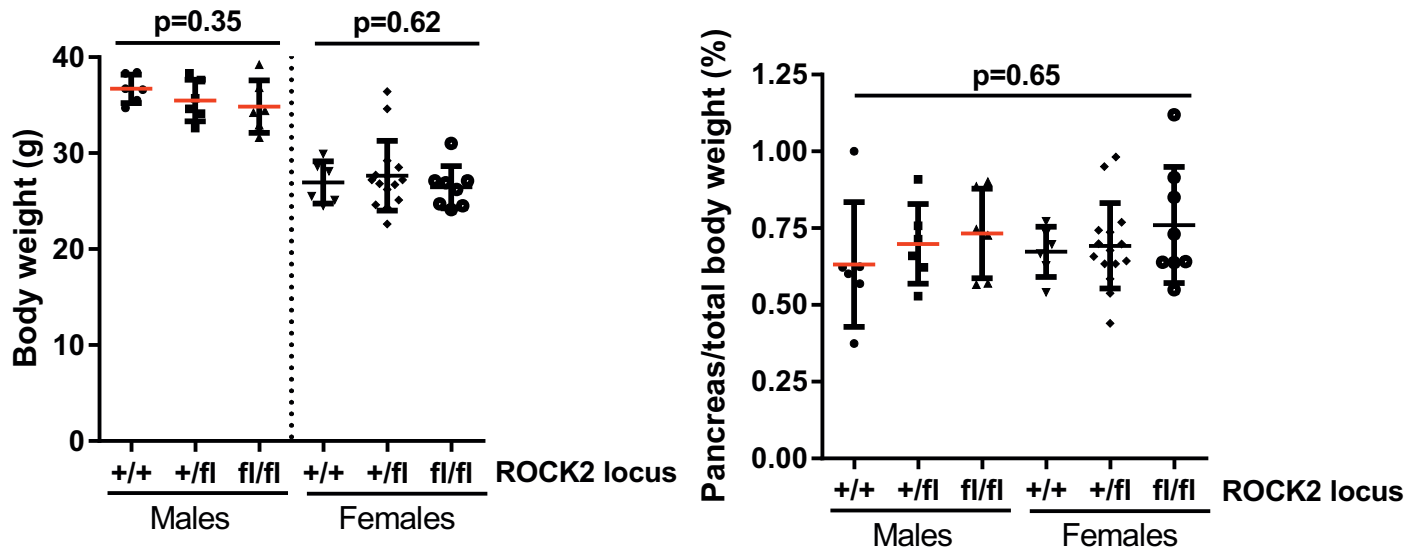

**Appendix Figure S2 - Tissue selective expression of conditionally-regulated ROCK2 (related to Fig 1).**

A, B Immunoblot of ROCK2:ER fusion protein in pancreata of 2 *LSL-ROCK2:ER; Pdx1-Cre* mice induced by Cre-mediated recombination but not in 2 *LSL-ROCK2:ER* mice (A) and uncropped immunoblot (B).

C Primary acinar cells from *Pdx1-Cre* or *Pdx1-Cre; LSL-ROCK2:ER* mice were cultured with vehicle or 2  $\mu$ M 4HT, and imaged after 5 days (left, scale bar = 200  $\mu$ m), or assessed for attachment after 48 h (right). Means  $\pm$  SEM (n=4), p value by ratio paired t test.

D Primary acinar cells from *Pdx1-Cre; LSL-KRas<sup>G12D/+</sup>* mice were cultured with vehicle or 10  $\mu$ M Y27632, and imaged after 48 h (left, scale bar = 200  $\mu$ m), or assessed for attachment after 48 h (right). Means  $\pm$  SEM (n=9), p value by ratio paired t test.

E Primary acinar cells from *Pdx1-Cre* mice were cultured with vehicle or 10  $\mu$ M Y27632, and assessed for attachment after 48 h. Means  $\pm$  SEM (n=4), p value by ratio paired t test.

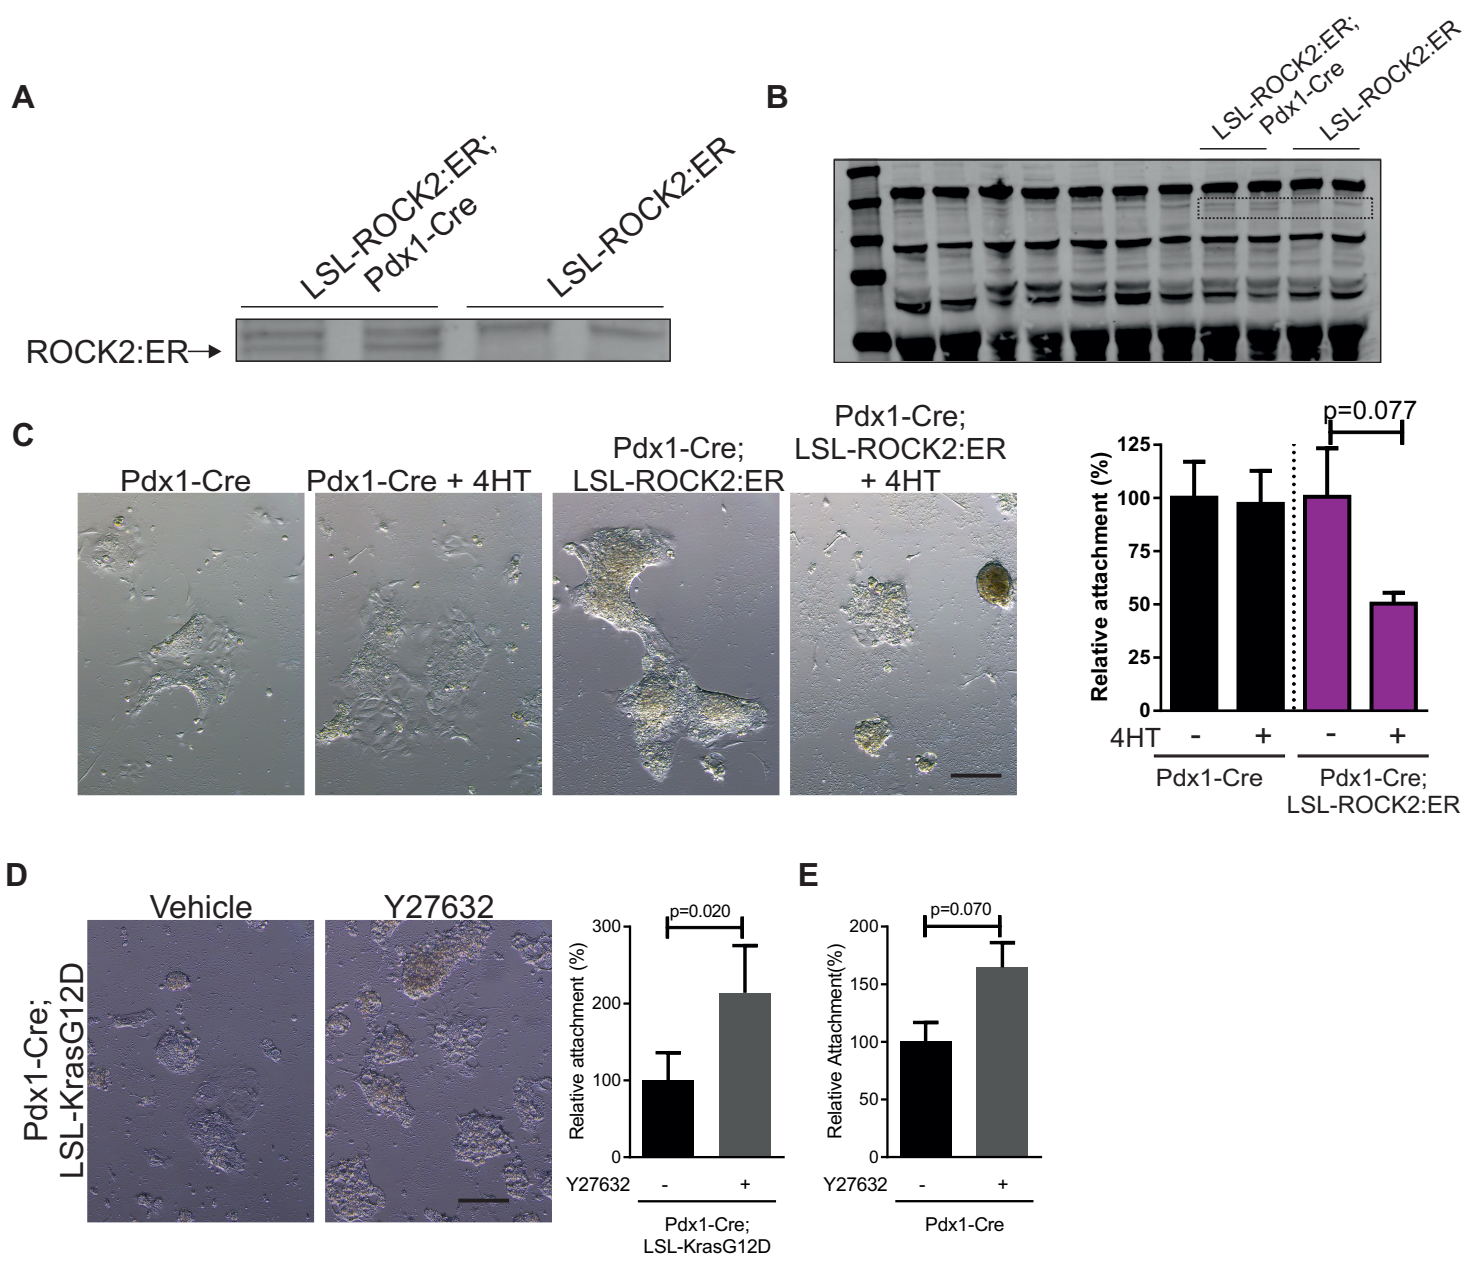

**Appendix Figure S3 - Conditional ROCK activation in KC mice does not alter PanIN numbers (related to Fig 1).**

*Pdx1-Cre; LSL-KRas<sup>G12D/+</sup>* (KC) or *Pdx1-Cre; LSL-KRas<sup>G12D/+</sup>; LSL-ROCK2:ER* (RKC) mice were treated with 1% EtOH vehicle or tamoxifen citrate (100 mg/L) for conditional ROCK activation for 14 days starting at 6 weeks of age. No differences in the incidence of PanINs were observed in 8 week old mice (n=7). Box plots with p-value determined by Kruskal-Wallis test.



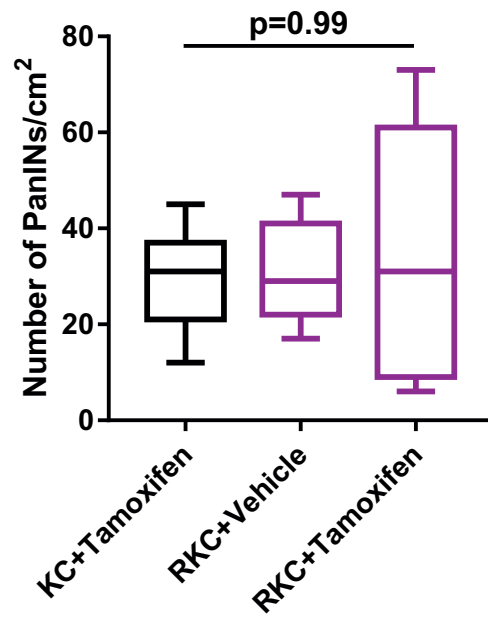

**Appendix Figure S4 - Invasion of KPC or KPfC cells into fibroblast conditioned collagen (related to Fig 2).**

H&E stained sections of cell invasion into collagen matrix after 8 days, in the presence (top) or absence of matrix-embedded fibroblasts (bottom). Scale bar = 100  $\mu$ m. Invasion index of KPC and KPfC cells. Means  $\pm$  SEM (n=6), p value by unpaired t test.

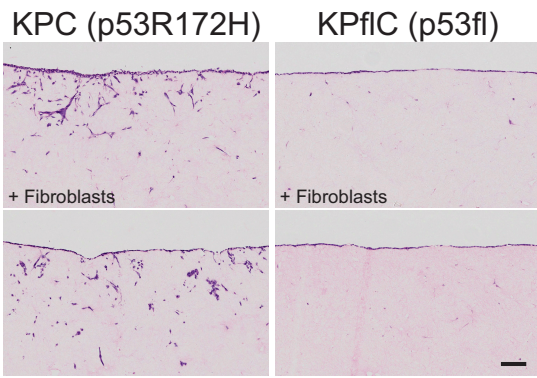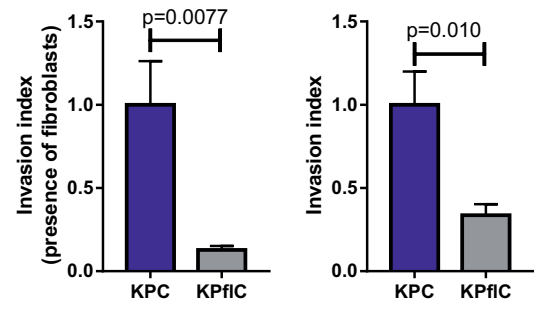

**Appendix Figure S5 - ROCK-induced substrate phosphorylation and changes in cell morphology (related to Fig 2).**

A Ratio of phosphorylated MLC (pMLC) to total MLC for KPfIC cells expressing indicated ER-fusion proteins as shown in Fig 2C. Cells were left untreated or treated with 4HT in the absence or presence of 1  $\mu$ M or 10  $\mu$ M H1152 as indicated. Means  $\pm$  SEM (n=3).

B KPfIC cells expressing indicated ER-fusion proteins, grown as adherent cells and treated with vehicle or 1  $\mu$ M 4HT for 24 h (scale bar = 50  $\mu$ m).

**A**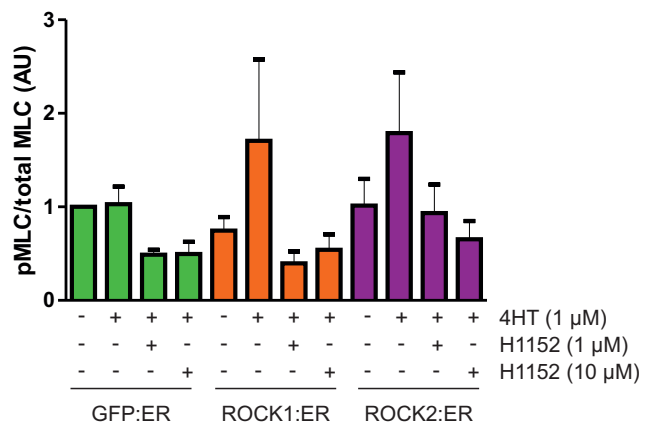**B**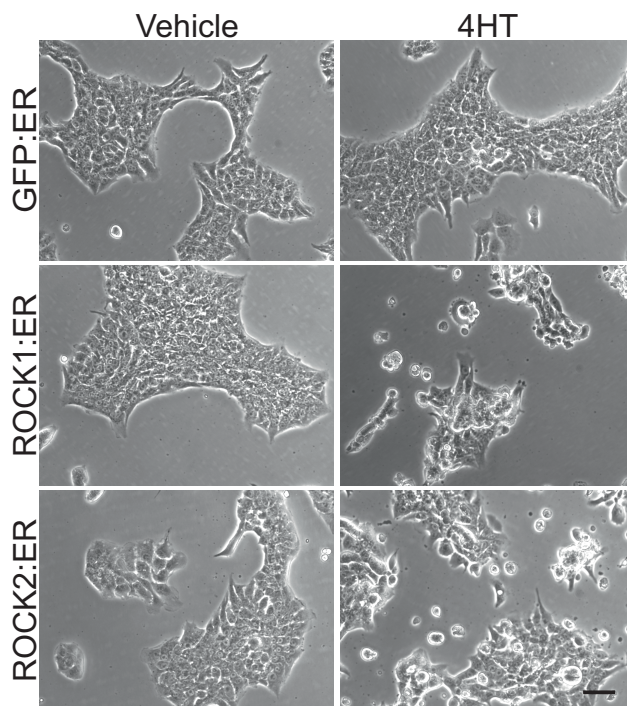

**Appendix Figure S6 - Average RNA sequence reads for indicated collagens with >10 copies detected. (related to Fig 4).**

Means  $\pm$  SEM (n=3) \* adjusted p-value <0.05.

Collagens >10 copies

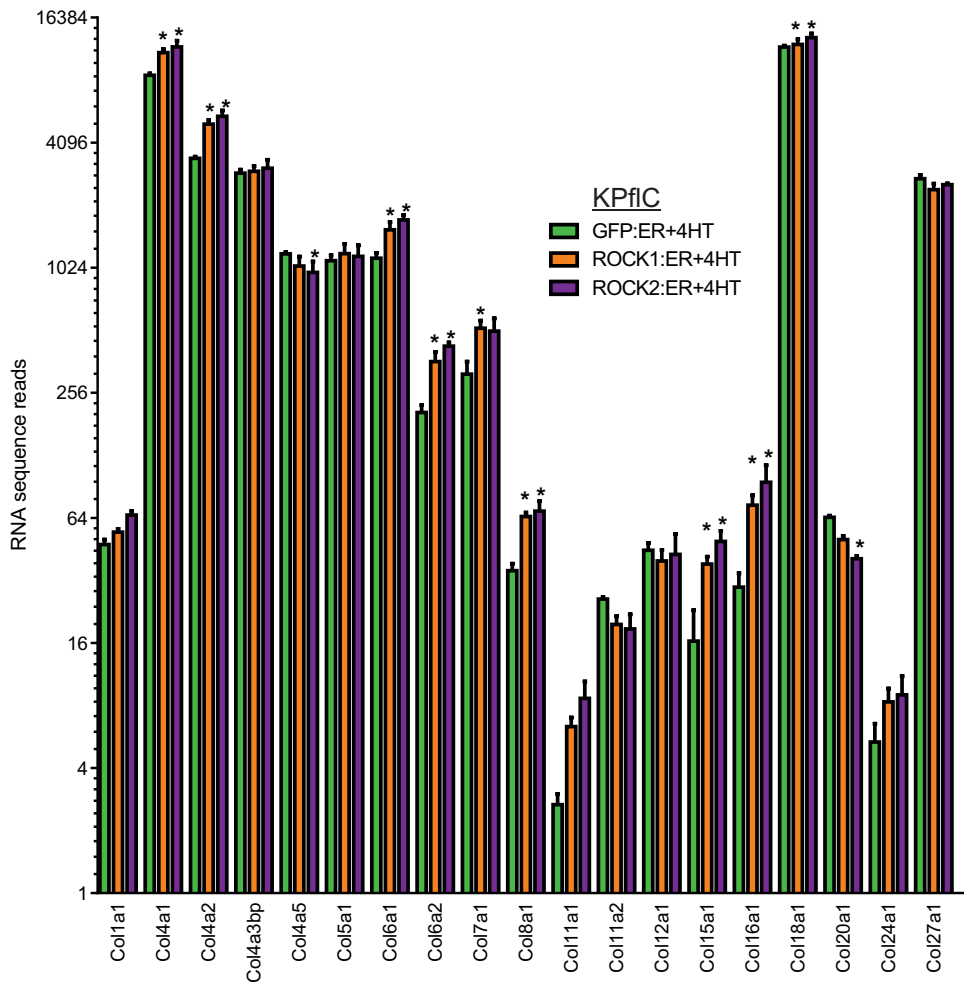

**Appendix Figure S7 - Analysis of KPC mouse tumors with Fasudil ROCK inhibitor treatment (related to Fig 8).**

A-E PDAC endpoint tumors were examined for percentages of SMA positive area, Ki67 positive cells, necrotic area, CD3 positive cells and CD31 positive cells as indicated. Box plots with exact p value by Mann-Whitney test.



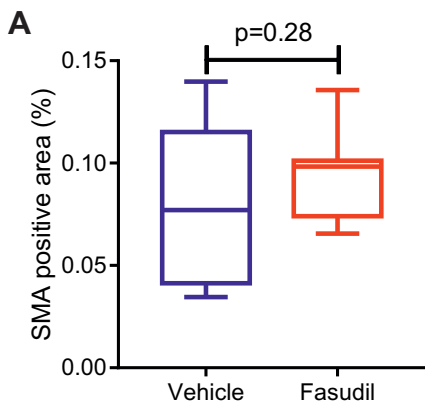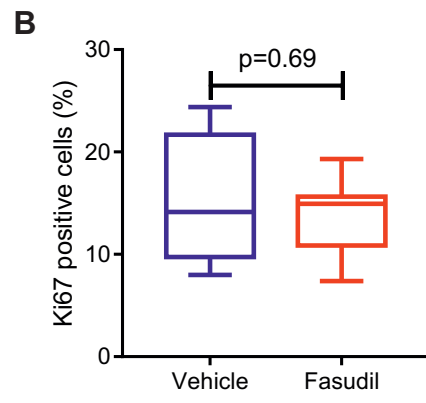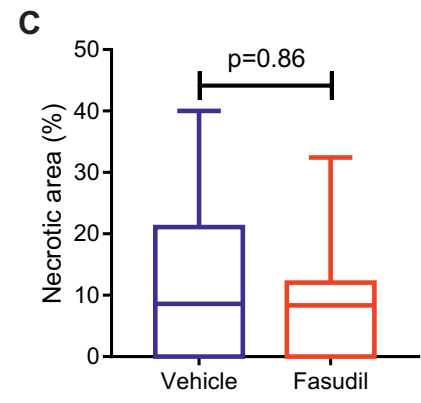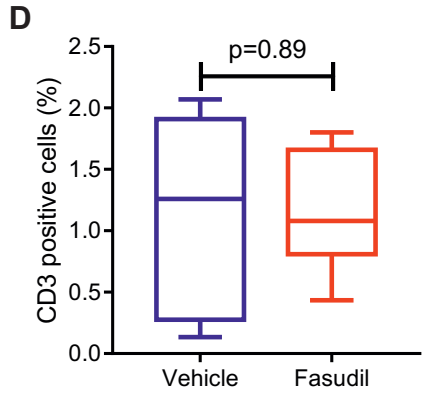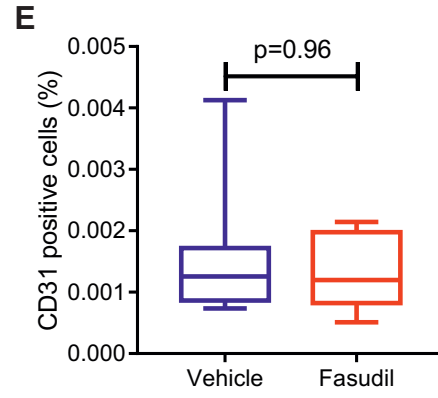

**Appendix Table S1 - ROCK induced changes in gene expression associated with Metacore™ gene process networks.**

|   | <b>Networks</b>                                         | <b>Total in network</b> | <b>p-value</b> | <b>FDR</b> | <b>In Data</b> | <b>Network Objects from Active Data</b>                                                                                                                                                                                                                                                                                                                                                        |
|---|---------------------------------------------------------|-------------------------|----------------|------------|----------------|------------------------------------------------------------------------------------------------------------------------------------------------------------------------------------------------------------------------------------------------------------------------------------------------------------------------------------------------------------------------------------------------|
| 1 | Cell adhesion_Cell-matrix interactions                  | 211                     | 3.551E-08      | 5.398E-06  | 37             | MMP-12, Galectin-3, ADAM33, ADAM-TS1, COL4A2, ADAM23, Fibulin-2, ITGA6, COL6A1, MMP-13, CD44 (ICD), LAMC2, TIMP3, Stromelysin-2, Aggrecanase-1, LAMB3, Collagen IV, CD44, ITGA3, ADAM-TS15, CD38, Tenascin-C, LAMB1, ITIH2, COL16A1, A1M, ITGB6, CD44 soluble, Aggrecan, ADAM-TS14, LAMR1, TIMP1, Connexin 43, CD44 (EXT), Aggrecanase-2, Versican, TINAG                                      |
| 2 | Proteolysis_Connective tissue degradation               | 119                     | 2.664E-06      | 2.025E-04  | 23             | MMP-12, Meprin, ADAM33, ADAM-TS1, ADAM23, Meprin A, alpha, MMP-13, TIMP3, ADAM8, Stromelysin-2, Aggrecanase-1, Collagen IV, PLAT (TPA), ADAM-TS15, Tenascin-C, COL16A1, PAI1, PLAU (UPA), Aggrecan, ADAM-TS14, TIMP1, Aggrecanase-2, TINAG                                                                                                                                                     |
| 3 | Cell adhesion_Integrin-mediated cell-matrix adhesion    | 214                     | 2.845E-05      | 1.135E-03  | 31             | Tubulin beta, Talin, Cyclin D1, PI3K cat class IA, Tubulin beta 3, Fibulin-2, ITGA6, Tubulin alpha, Beta-parvin, Filamin A, Caveolin-1, Collagen IV, Tubulin alpha 1A, Lpd, ITGA3, LIMK1, CD53, Tenascin-C, ERM proteins, MyHC, Tcf(Lef), Filamin B (TABP), ITGB6, Zyxin, Tubulin beta 2, PI3K cat class IA (p110-delta), Filamin C, Cyr61, TINAG, Tubulin alpha-4A, Tubulin (in microtubules) |
| 4 | Development_Ossification and bone remodeling            | 157                     | 3.477E-05      | 1.135E-03  | 25             | ATF-4, GDF11(BMP11), TGF-beta, TIEG, SHH, Filamin A, Ihh, TWIST1, Hedgehog, FGFR2, CSF1, TIEG1, SLC26A2, Spp24, WNT7A, ETS, WNT, BMP4, Annexin II, p38 MAPK, Galpha(s)-specific calcitonin GPCRs, p90Rsk, IBP, Frizzled, Activin                                                                                                                                                               |
| 5 | Signal transduction_WNT signaling                       | 177                     | 3.732E-05      | 1.135E-03  | 27             | COX-2 (PTGS2), WNT4, TGF-beta 2, WNT10A, PP2A regulatory, TGF-beta, Cyclin D1, DLX2, Adenylate cyclase type I, ERK3, E2F2, p38beta (MAPK11), ESR1 (nuclear), CD44, WNT7B, Fra-1, DAAM1, Tcf(Lef), WNT7A, Cyclin E, WNT, SLUG, p38 MAPK, Adenylate cyclase, TCF7L2 (TCF4), Frizzled, IP3 receptor                                                                                               |
| 6 | Cytoskeleton_Regulation of cytoskeleton rearrangement   | 183                     | 6.772E-05      | 1.716E-03  | 27             | Ankyrin-G, Plectin 1, Tubulin beta, Talin, SPTBN(spectrin1-4), Advillin (p92), Tubulin beta 3, Galpha(i)-specific amine GPCRs, RhoF (Rif), Tubulin alpha, Filamin A, VAV-3, RHO6, Tubulin alpha 1A, CD43, CD44, LIMK1, ERM proteins, MyHC, Filamin B (TABP), Beta-fodrin, Zyxin, Tubulin beta 2, Filamin C, WasplP, Protein kinase G, Tubulin (in microtubules)                                |
| 7 | Proliferation_Negative regulation of cell proliferation | 184                     | 1.897E-04      | 4.120E-03  | 26             | COX-2 (PTGS2), GDF11(BMP11), GAB2, Galpha(i)-specific peptide GPCRs, FGFR3, ADAM-TS1, TGF-                                                                                                                                                                                                                                                                                                     |

|    |                                                                    |     |           |           |    |                                                                                                                                                                                                                                                                                                                                                                                                                                                                                             |
|----|--------------------------------------------------------------------|-----|-----------|-----------|----|---------------------------------------------------------------------------------------------------------------------------------------------------------------------------------------------------------------------------------------------------------------------------------------------------------------------------------------------------------------------------------------------------------------------------------------------------------------------------------------------|
|    |                                                                    |     |           |           |    | beta, Cyclin D1, PI3K cat class IA, Amphiregulin, Calcizzarin, VEGFR-2, GRO-1, OSMR, BTG2, p21, IBP5, PI3K reg class IB (p101), ETS1, Cyclin E, Sestrin 1, IBP, MAD4, IL6RA, C/EBPalpha, IBP3                                                                                                                                                                                                                                                                                               |
| 8  | Blood coagulation                                                  | 94  | 4.137E-04 | 7.860E-03 | 16 | Galpha(q)-specific nucleotide-like GPCRs, MSP, Thrombomodulin, PAR1, Caveolin-1, Collagen IV, Protein C receptor (endothelial), Tissue factor, PLAT (TPA), Protein S, Protein C, PAR2, PAI1, Adenosine A2a receptor, SERPINF2, PLAU (UPA)                                                                                                                                                                                                                                                   |
| 9  | Development_Blood vessel morphogenesis                             | 228 | 5.137E-04 | 8.675E-03 | 29 | Neuropilin-2, Galpha(i)-specific peptide GPCRs, Galpha(q)-specific nucleotide-like GPCRs, PI3K cat class IA, Galpha(i)-specific amine GPCRs, Amphiregulin, VEGFR-2, PAR1, Galpha(q)-specific peptide GPCRs, ALDOA, Transferrin, Galpha(s)-specific nucleotide-like GPCRs, LDHA, Alpha-1B adrenergic receptor, PGAR, PLGF, PDE3B, PDE, PLAT (TPA), Neuregulin 1, Epiregulin, BMP4, Galpha(q)-specific amine GPCRs, Adenosine A2a receptor, PGK1, Neuropilin-1, Protein kinase G, Cyr61, FGF1 |
| 10 | Cell adhesion_Platelet aggregation                                 | 158 | 7.154E-04 | 1.087E-02 | 22 | COX-2 (PTGS2), GAB2, Talin, PI3K cat class IA, PAR1, Adenylate cyclase type I, PLA2G7, Filamin A, VAV-3, Alpha-2A adrenergic receptor, Collagen IV, PLA2, MyHC, Ca-ATPase3, THAS, P-selectin, ENTPD2-alpha, Gab, Adenylate cyclase, PI3K cat class IA (p110-delta), IP3 receptor, Adenylate cyclase type VII                                                                                                                                                                                |
| 11 | Proteolysis_ECM remodeling                                         | 85  | 1.306E-03 | 1.678E-02 | 14 | MMP-12, ADAM33, MMP-13, TIMP3, Stromelysin-2, Aggrecanase-1, Collagen IV, PLAT (TPA), Tenascin-C, PAI1, PLAU (UPA), Aggrecan, ADAM-TS14, TIMP1                                                                                                                                                                                                                                                                                                                                              |
| 12 | Cytoskeleton_Actin filaments                                       | 176 | 1.324E-03 | 1.678E-02 | 23 | Ankyrin-G, Plectin 1, Talin, SPTBN(spectrin1-4), MYH10, Filamin A, CD44, Myosin I, Troponin T, cardiac, LIMK1, DAAM1, ERM proteins, MyHC, Filamin B (TABP), Annexin II, NEBL, Beta-fodrin, Zyxin, Tropomyosin-4, Filamin C, Tropomyosin, WasplP, Protein kinase G                                                                                                                                                                                                                           |
| 13 | Cell adhesion_Cell junctions                                       | 162 | 2.340E-03 | 2.735E-02 | 21 | GJC1, Tubulin beta, Nectin-2, JAM2, ZO-3, PI3K cat class IA, ATP1B1, Tubulin alpha, Desmocollin 3, WNK4, Plakophilin 1, Connexin 45, Caveolin-1, Tcf(Lef), DSC2, Beta-fodrin, Connexin 31, Claudin-7, Connexin 43, SIP1 (ZFH1B), Tubulin (in microtubules)                                                                                                                                                                                                                                  |
| 14 | Development_EMT_Regulation of epithelial-to-mesenchymal transition | 225 | 3.882E-03 | 4.215E-02 | 26 | COX-2 (PTGS2), PDGF-A, GAB2, 4E-BP1, TGF-beta 2, Nestin, TGF-beta, PI3K cat class IA, HMG2A2, PDGF-B, TWIST1, FGFR2, ESR1 (nuclear), Keratin 14, ETS1, Cyclin E, WNT, BMP4, SLUG, p38 MAPK, PAI1, SOX9, p90Rsk, Frizzled, SIP1 (ZFH1B), FGF1                                                                                                                                                                                                                                                |
| 15 | Development_Neurogenesis_Axonal guidance                           | 230 | 5.208E-03 | 5.277E-02 | 26 | Neuropilin-2, Ephrin-A receptor 7, MYH10, ADAM23, PI3K cat class IA, Ephrin-A receptors, APOE, FMR2, DCAMKL1, Adenylate cyclase type I, CRMP4, RHO6, DARPP-32,                                                                                                                                                                                                                                                                                                                              |

|    |                                                                               |     |           |           |    |                                                                                                                                                                                                                                                                                                                          |
|----|-------------------------------------------------------------------------------|-----|-----------|-----------|----|--------------------------------------------------------------------------------------------------------------------------------------------------------------------------------------------------------------------------------------------------------------------------------------------------------------------------|
|    |                                                                               |     |           |           |    | Semaphorin 7A, LIMK1, APOER2, ERM proteins, MyHC, BDNF, Ephrin-A receptor 2, Selenoprotein P, Neuropilin-1, IP3 receptor, MIR (Idol), Tubulin (in microtubules), Plexin A4                                                                                                                                               |
| 16 | Cell adhesion_Cadherins                                                       | 180 | 8.076E-03 | 7.672E-02 | 21 | WNT4, Galectin-3, PTP-2, PTPRF (LAR), Nectin-2, WNT10A, PTPRmu, PI3K cat class IA, FXYD5, Desmocollin 3, Plakophilin 1, ITGA3, PDZK3, VLDLR, Tcf(Lef), WNT7A, WNT, DSC2, LI-cadherin, Frizzled, Tubulin (in microtubules)                                                                                                |
| 17 | Reproduction_FSH-beta signaling pathway                                       | 160 | 9.538E-03 | 8.528E-02 | 19 | 4E-BP1, TGF-beta 2, FSRP, PP2A regulatory, PI3K cat class IA, p90RSK3(RPS6KA2), Activin beta A, DUSP5, Adenylate cyclase type I, PEA3, Epiregulin, BMP4, p38 MAPK, Adenylate cyclase, p90Rsk, IBP, IP3 receptor, Cyclin D, IBP3                                                                                          |
| 18 | Cardiac development_Wnt_beta-catenin, Notch, VEGF, IP3 and integrin signaling | 150 | 1.033E-02 | 8.727E-02 | 18 | Neuropilin-2, ID1, GLI-3R, CRLR, VEGFR-2, GLI-3, Connexin 45, Alpha-1B adrenergic receptor, Troponin T, cardiac, MyHC, Tcf(Lef), HHEX (PRH), WNT, Galpha(s)-specific calcitonin GPCRs, Frizzled, Connexin 43, IP3 receptor, Versican                                                                                     |
| 19 | Development_Neurogenesis_Synaptogenesis                                       | 180 | 1.592E-02 | 1.274E-01 | 20 | Homer, Synaptotagmin, X11, Neuregulin 4, Synapsin I, Semaphorin 4F, APOE, nAChR alpha, FGFR2, Synaptotagmin XI, Neuregulin 2, APOER2, Neuregulin 1, WNT7A, FGFR4, WNT, BDNF, DLGAP1 (GKAP), Semaphorin 4G, Frizzled                                                                                                      |
| 20 | Cytoskeleton_Intermediate filaments                                           | 81  | 1.762E-02 | 1.339E-01 | 11 | Plectin 1, Tubulin beta, Nestin, Tubulin alpha, Plakophilin 1, Desmuslin, Keratin 14, ZNF239, Tubulin beta 2, Lamin A/C, Tubulin (in microtubules)                                                                                                                                                                       |
| 21 | Chemotaxis                                                                    | 137 | 1.916E-02 | 1.387E-01 | 16 | GRO-2, Galpha(i)-specific peptide GPCRs, PI3K cat class IA, CXCL16, GRO-1, Galpha(q)-specific peptide GPCRs, CCL13, CD43, CD44, Fra-1, CCL2, GRO-3, p38 MAPK, C3aR, PLAU (UPA), Cyr61                                                                                                                                    |
| 22 | Proliferation_Positive regulation cell proliferation                          | 221 | 2.097E-02 | 1.442E-01 | 23 | COX-2 (PTGS2), GAB2, Galpha(i)-specific peptide GPCRs, Glypican-1, Cyclin D1, PI3K cat class IA, Galpha(i)-specific amine GPCRs, SHH, FGFR2, Alpha-2A adrenergic receptor, CSF1, p21, Fra-1, PLGF, Alpha-1D adrenergic receptor, Cyclin E, GM-CSF, N-Myc, Neuropilin-1, PI3K cat class IA (p110-delta), TIMP1, LIF, LIFR |
| 23 | Cell adhesion_Platelet-endothelium-leucocyte interactions                     | 174 | 2.182E-02 | 1.442E-01 | 19 | PDGF-A, TGF-beta 2, JAM2, TGF-beta, Thrombomodulin, VEGFR-2, MMP-13, PDGF-B, Collagen IV, CD44, CCL2, PLAT (TPA), VLDLR, Protein S, Protein C, P-selectin, PAI1, PLAU (UPA), Cyr61                                                                                                                                       |
| 24 | Immune response_Th17-derived cytokines                                        | 98  | 2.850E-02 | 1.787E-01 | 12 | COX-2 (PTGS2), C/EBP, PI3K cat class IA, PGES, GRO-1, MMP-13, Calgranulin A, CCL2, Calgranulin B, p38 MAPK, GM-CSF, TIMP1                                                                                                                                                                                                |
| 25 | Development_Cartilage development                                             | 66  | 2.955E-02 | 1.787E-01 | 9  | TR-alpha, Activin beta A, MMP-13, p38beta (MAPK11), Ihh, Aggrecanase-1, BMP4, SOX9, Aggrecan                                                                                                                                                                                                                             |
| 26 | Development_Hedgehog signaling                                                | 254 | 3.057E-02 | 1.787E-01 | 25 | ID1, LRP2 (Megalin), Cyclin D1, GLI-3R, Activin beta A, DLX2, DHH, SHH, Adenylate cyclase type I, Filamin A, p38beta (MAPK11), Ihh, Hedgehog, FGFR2, GLI-3, p21,                                                                                                                                                         |

|    |                                                                 |     |           |           |    |                                                                                                                                                                                                                                                                                                               |
|----|-----------------------------------------------------------------|-----|-----------|-----------|----|---------------------------------------------------------------------------------------------------------------------------------------------------------------------------------------------------------------------------------------------------------------------------------------------------------------|
|    |                                                                 |     |           |           |    | ROR-alpha, PI3K reg class IB (p101), BMP4, N-Myc, Adenylate cyclase, SOX9, TCF7L2 (TCF4), Frizzled, Adenylate cyclase type VII                                                                                                                                                                                |
| 27 | Apoptosis_Anti-apoptosis mediated by external signals via NF-kB | 111 | 3.209E-02 | 1.806E-01 | 13 | COX-2 (PTGS2), PDGF-A, PP2A regulatory, PI3K cat class IA, VEGFR-2, PDGF-B, Bcl-3, APRIL(TNFSF13), PI3K reg class IB (p101), GM-CSF, Adenylate cyclase, p90Rsk, FN14(TNFRSF12A)                                                                                                                               |
| 28 | Cell adhesion_Amyloid proteins                                  | 195 | 3.433E-02 | 1.864E-01 | 20 | PAK3, WNT4, BACE2, ADAM33, TGF-beta 2, X11, WNT10A, Filamin A, Caveolin-1, Collagen IV, WNT7B, PDZK3, LIMK1, Tcf(Lef), WNT7A, Filamin B (TABP), WNT, Frizzled, Connexin 43, Tubulin (in microtubules)                                                                                                         |
| 29 | Inflammation_IL-13 signaling pathway                            | 91  | 3.808E-02 | 1.953E-01 | 11 | IL1RN, Adenylate cyclase type I, IL13RA1, DCOR, CCL2, Tenascin-C, HSD3B1, FOXJ1, PI3K cat class IA (p110-delta), IP3 receptor, SOCS1                                                                                                                                                                          |
| 30 | Reproduction_Feeding and Neurohormone signaling                 | 211 | 4.058E-02 | 1.953E-01 | 21 | 4E-BP1, TGF-beta 2, Galpha(i)-specific peptide GPCRs, LRP2 (Megalin), PP2A regulatory, TGF-beta, MSP, PI3K cat class IA, Galpha(q)-specific peptide GPCRs, Adenylate cyclase type I, FCGRT, PEA3, CD44, DCOR, ITGA3, Cyclin E, PAI1, Pim-1, SOX9, IBP3, SOCS1                                                 |
| 31 | Signal transduction_NOTCH signaling                             | 236 | 4.074E-02 | 1.953E-01 | 23 | PDGF-A, WNT4, 4E-BP1, TGF-beta 2, WNT10A, TGF-beta, GLUT1, Cyclin D1, PI3K cat class IA, Amphiregulin, PDGF-B, p38beta (MAPK11), p21, CD44, WNT7B, Neuregulin 1, WNT7A, Epiregulin, FZD7, WNT, p38 MAPK, Frizzled, PI3K cat class IA (p110-delta)                                                             |
| 32 | Cytoskeleton_Cytoplasmic microtubules                           | 115 | 4.112E-02 | 1.953E-01 | 13 | Tubulin beta, X11, Dynein, axonemal, heavy chains, Tubulin beta 3, RhoF (Rif), Tubulin alpha, MAP6, Tubulin alpha 1A, MAPRE2(RP1), TUBGCP2, DLGAP1 (GKAP), HOOK2, Tubulin (in microtubules)                                                                                                                   |
| 33 | Reproduction_Progesterone signaling                             | 214 | 4.611E-02 | 2.068E-01 | 21 | COX-2 (PTGS2), ESR1 (membrane), MIF, ADAM-TS1, PI3K cat class IA, PDE3, Galpha(q)-specific peptide GPCRs, Adenylate cyclase type I, JDP2, ESR1 (nuclear), PLA2, DHB4, PDE3B, Tcf(Lef), WNT, Adenylate cyclase, Galpha(s)-specific calcitonin GPCRs, p90Rsk, Frizzled, IP3 receptor, Tubulin (in microtubules) |
| 34 | Cardiac development_BMP_TGF_beta_s signaling                    | 117 | 4.626E-02 | 2.068E-01 | 13 | TGF-beta 2, ID1, MYH10, GLI-3R, GLI-3, ESR1 (nuclear), Activin A, Troponin T, cardiac, MyHC, Troponin C, cardiac, BMP4, SLUG, SOX9                                                                                                                                                                            |
| 35 | Inflammation_Amphoterin signaling                               | 118 | 4.898E-02 | 2.127E-01 | 13 | PI3K cat class IA, MMP-13, IL1RN, p38beta (MAPK11), Calgranulin A, CCL2, LIMK1, PLAT (TPA), MyHC, Calgranulin B, p38 MAPK, PAI1, PI3K cat class IA (p110-delta)                                                                                                                                               |

**Appendix Table S2 - RNA sequencing reads for Mmp and Timp transcripts.**

|              |          | RNA sequence reads |          |          |          |          |          |         |         |         |         |         |         |         |         |         |
|--------------|----------|--------------------|----------|----------|----------|----------|----------|---------|---------|---------|---------|---------|---------|---------|---------|---------|
|              |          | D2_log2F           |          |          | D2_log2F |          |          | GFP_4HT |         |         | ROCK1_4 |         |         | ROCK2_4 |         |         |
|              |          | oldChang           | D2_pvalu | D2_padj( | oldChang | D2_pvalu | D2_padj( | GFP_4HT | GFP_4HT | GFP_4HT | ROCK1_4 | ROCK1_4 | ROCK1_4 | ROCK2_4 | ROCK2_4 | ROCK2_4 |
|              |          | e(ROCK1_           | e(ROCK1_ | ROCK1_4  | e(ROCK2_ | e(ROCK2_ | ROCK2_4  | _1      | _2      | _3      | HT_1    | HT_2    | HT_3    | HT_1    | HT_2    | HT_3    |
| symbol       |          | 4HT_vs_G           | 4HT_vs_G | HT_vs_GF | 4HT_vs_G | 4HT_vs_G | HT_vs_GF | FP_4HT) | FP_4HT) | FP_4HT) | HT_1    | HT_2    | HT_3    | HT_1    | HT_2    | HT_3    |
| Collagenases | Mmp1a    | NA                 | NA       | NA       | NA       | NA       | NA       | 0       | 0       | 0       | 0       | 0       | 0       | 0       | 0       | 0       |
|              | Mmp1b    | NA                 | NA       | NA       | NA       | NA       | NA       | 0       | 0       | 0       | 0       | 0       | 0       | 0       | 0       | 0       |
|              | Mmp8     | NA                 | NA       | NA       | NA       | NA       | NA       | 0       | 0       | 0       | 0       | 0       | 0       | 0       | 0       | 0       |
|              | Mmp13    | 3.405297           | 2.55E-28 | 6.06E-26 | 3.70139  | 2.94E-33 | 6.37E-31 | 50      | 46      | 49      | 476     | 679     | 363     | 530     | 959     | 591     |
| Gelatinases  | Mmp2     | 0.003215           | 0.993782 | NA       | 0.359147 | 0.397855 | NA       | 0       | 0       | 0       | 0       | 0       | 0       | 0       | 1       | 0       |
|              | Mmp9     | 0.03459            | 0.967397 | NA       | 1.39613  | 0.106042 | NA       | 1       | 0       | 0       | 0       | 0       | 1       | 1       | 5       | 1       |
| Stromelysins | Mmp3     | 2.321984           | 0.002659 | NA       | 2.130918 | 0.005915 | NA       | 0       | 2       | 0       | 4       | 11      | 4       | 4       | 9       | 5       |
|              | Mmp10    | 4.456138           | 2.11E-22 | 2.95E-20 | 4.952517 | 1.52E-27 | 2.19E-25 | 3       | 6       | 2       | 75      | 146     | 69      | 123     | 227     | 108     |
|              | Mmp11    | -0.06396           | 0.65525  | 0.774096 | -0.17104 | 0.232381 | 0.386352 | 542     | 541     | 649     | 386     | 494     | 653     | 408     | 592     | 544     |
| MT-MMPs      | Mmp14    | 0.19228            | 0.052914 | 0.130848 | 0.091522 | 0.356834 | 0.525506 | 3236    | 2977    | 3810    | 3214    | 3245    | 4117    | 3354    | 3633    | 3668    |
|              | Mmp15    | -0.32209           | 0.001578 | 0.007868 | -0.34341 | 0.000745 | 0.003808 | 2716    | 2475    | 2811    | 1981    | 1702    | 2214    | 2211    | 1976    | 2070    |
|              | Mmp16    | -0.38359           | 0.379612 | NA       | -0.38704 | 0.379023 | NA       | 0       | 1       | 0       | 0       | 0       | 0       | 0       | 0       | 0       |
|              | Mmp17    | -0.23058           | 0.624187 | NA       | -0.57807 | 0.227735 | 0.381344 | 11      | 10      | 19      | 6       | 14      | 11      | 7       | 12      | 7       |
|              | Mmp24    | 3.831482           | 2.25E-08 | NA       | 3.769133 | 3.68E-08 | 5.74E-07 | 0       | 1       | 0       | 17      | 24      | 10      | 13      | 28      | 13      |
| Mmp25        | 0.003561 | 0.993347           | NA       | 0.388659 | 0.377848 | NA       | 0        | 0       | 0       | 0       | 0       | 0       | 0       | 0       | 0       | 1       |
| Matrilysin   | Mmp7     | NA                 | NA       | NA       | NA       | NA       | NA       | 0       | 0       | 0       | 0       | 0       | 0       | 0       | 0       | 0       |
| Others       | Mmp12    | 0.003803           | 0.993036 | NA       | 0.000106 | 0.999807 | NA       | 0       | 0       | 0       | 0       | 0       | 0       | 0       | 0       | 0       |
|              | Mmp19    | 0.75619            | 0.053251 | 0.131397 | 0.938257 | 0.014749 | 0.045962 | 14      | 13      | 13      | 12      | 32      | 20      | 19      | 35      | 26      |
|              | Mmp20    | NA                 | NA       | NA       | NA       | NA       | NA       | 0       | 0       | 0       | 0       | 0       | 0       | 0       | 0       | 0       |
|              | Mmp21    | -0.37722           | 0.383874 | NA       | -0.38059 | 0.383298 | NA       | 1       | 0       | 0       | 0       | 0       | 0       | 0       | 0       | 0       |
|              | Mmp23    | -1.08272           | 8.24E-05 | 0.000657 | -0.60269 | 0.021261 | 0.061806 | 62      | 64      | 80      | 38      | 13      | 37      | 36      | 55      | 44      |
|              | Mmp27    | -0.74639           | 0.309149 | NA       | -0.02728 | 0.971456 | NA       | 1       | 0       | 1       | 0       | 0       | 0       | 0       | 2       | 0       |
|              | Mmp28    | 0.077473           | 0.489099 | 0.641417 | -0.06304 | 0.573828 | 0.718039 | 623     | 519     | 551     | 534     | 488     | 625     | 485     | 531     | 600     |
| Inhibitors   | Timp1    | 0.753121           | 1.04E-09 | 2.54E-08 | 1.006326 | 1.37E-16 | 7.25E-15 | 247     | 220     | 252     | 318     | 429     | 370     | 476     | 506     | 464     |
|              | Timp2    | -0.11704           | 0.017681 | 0.05635  | -0.10203 | 0.038417 | 0.099637 | 13329   | 12456   | 13380   | 10343   | 10826   | 12100   | 11168   | 12965   | 12334   |
|              | Timp3    | 0.736928           | 3.72E-13 | 1.66E-11 | 0.646805 | 1.78E-10 | 4.18E-09 | 1345    | 1118    | 1004    | 1719    | 1672    | 1939    | 1538    | 1984    | 1921    |
|              | Timp4    | -2.79873           | 7.79E-05 | NA       | -2.03629 | 0.001699 | NA       | 10      | 9       | 13      | 0       | 1       | 1       | 2       | 4       | 0       |

**Appendix Table S3 - RNA sequencing reads for collagen transcripts.**



RNA sequence reads

| symbol   | D2_log2F |          |          | D2_log2F |          |          | RNA sequence reads |          |          |          |          |          |          |          |          |          |          |          |
|----------|----------|----------|----------|----------|----------|----------|--------------------|----------|----------|----------|----------|----------|----------|----------|----------|----------|----------|----------|
|          | oldChang | D2_pvalu | D2_padj( | oldChang | D2_pvalu | D2_padj( | GFP_4HT            |          |          | ROCK1_4  |          |          | ROCK2_4  |          |          |          |          |          |
|          | e(ROCK1_ | e(ROCK1_ | ROCK1_4  | e(ROCK2_ | e(ROCK2_ | ROCK2_4  | 4HT_vs_G           | 4HT_vs_G | HT_vs_GF | 4HT_vs_G | 4HT_vs_G | HT_vs_GF | 4HT_vs_G | 4HT_vs_G | HT_vs_GF | 4HT_vs_G | 4HT_vs_G | HT_vs_GF |
|          | FP_4HT)  | FP_4HT)  | P_4HT)   | FP_4HT)  | FP_4HT)  | P_4HT)   | 1                  | 2        | 3        | HT_1     | HT_2     | HT_3     | HT_1     | HT_2     | HT_3     | HT_1     | HT_2     | HT_3     |
| Col1a1   | 0.312066 | 0.15701  | 0.291354 | 0.465923 | 0.030863 | 0.083734 | 53                 | 45       | 45       | 51       | 55       | 58       | 70       | 68       | 60       |          |          |          |
| Col1a2   | 0.018414 | 0.979364 | NA       | 1.512879 | 0.04886  | NA       | 0                  | 0        | 0        | 0        | 0        | 0        | 2        | 1        | 1        |          |          |          |
| Col2a1   | 0.415513 | 0.630897 | NA       | -0.01121 | 0.989603 | NA       | 1                  | 0        | 0        | 0        | 1        | 1        | 0        | 1        | 0        |          |          |          |
| Col3a1   | 0.415347 | 0.482824 | NA       | 0.406062 | 0.495073 | NA       | 0                  | 0        | 0        | 0        | 0        | 1        | 0        | 0        | 1        |          |          |          |
| Col4a1   | 0.478588 | 2.31E-13 | 1.06E-11 | 0.45232  | 4.20E-12 | 1.25E-10 | 8556               | 8992     | 8357     | 10570    | 10714    | 11991    | 10231    | 12914    | 12375    |          |          |          |
| Col4a2   | 0.663892 | 3.44E-23 | 5.02E-21 | 0.667922 | 1.66E-23 | 1.70E-21 | 3380               | 3562     | 3392     | 4756     | 4852     | 5492     | 4765     | 5881     | 5800     |          |          |          |
| Col4a3   | -0.15392 | 0.809322 | NA       | 0.082687 | 0.894652 | NA       | 5                  | 7        | 4        | 4        | 4        | 5        | 7        | 5        | 5        |          |          |          |
| Col4a3bp | 0.147223 | 0.10393  | 0.217937 | 0.076039 | 0.40079  | 0.567474 | 3131               | 2736     | 2886     | 2834     | 2767     | 3336     | 2480     | 3322     | 3443     |          |          |          |
| Col4a4   | -0.18678 | 0.82894  | NA       | -0.85667 | 0.317038 | NA       | 0                  | 3        | 1        | 0        | 1        | 2        | 0        | 1        | 0        |          |          |          |
| Col4a5   | -0.08187 | 0.509388 | 0.658514 | -0.30197 | 0.015111 | 0.04692  | 1202               | 1154     | 1228     | 866      | 1003     | 1259     | 726      | 1088     | 1103     |          |          |          |
| Col4a6   | 0.335089 | 0.701462 | NA       | 0.004966 | 0.995471 | NA       | 1                  | 1        | 0        | 1        | 0        | 2        | 0        | 0        | 2        |          |          |          |
| Col5a1   | 0.222949 | 0.132179 | 0.257836 | 0.067658 | 0.647867 | 0.776333 | 995                | 1094     | 1228     | 1035     | 1083     | 1467     | 892      | 1173     | 1417     |          |          |          |
| Col5a2   | 0.005609 | 0.990904 | NA       | 0.00014  | 0.999775 | NA       | 0                  | 0        | 0        | 0        | 0        | 0        | 0        | 0        | 0        |          |          |          |
| Col5a3   | -1.12081 | 0.117833 | NA       | -0.48486 | 0.476544 | NA       | 5                  | 7        | 3        | 0        | 2        | 3        | 3        | 4        | 3        |          |          |          |
| Col5a4   | 0.568581 | 2.02E-08 | 3.97E-07 | 0.609569 | 1.66E-09 | 3.36E-08 | 1113               | 1027     | 1270     | 1324     | 1546     | 1803     | 1553     | 1875     | 1784     |          |          |          |
| Col6a2   | 0.921556 | 5.28E-10 | 1.35E-08 | 1.055604 | 7.92E-13 | 2.63E-11 | 206                | 176      | 236      | 348      | 300      | 438      | 395      | 441      | 453      |          |          |          |
| Col6a3   | 1.340891 | 0.098938 | NA       | 1.415439 | 0.080235 | NA       | 0                  | 0        | 3        | 4        | 5        | 2        | 1        | 6        | 6        |          |          |          |
| Col6a4   | NA       | NA       | NA       | NA       | NA       | NA       | 0                  | 0        | 0        | 0        | 0        | 0        | 0        | 0        | 0        |          |          |          |
| Col6a5   | NA       | NA       | NA       | NA       | NA       | NA       | 0                  | 0        | 0        | 0        | 0        | 0        | 0        | 0        | 0        |          |          |          |
| Col6a6   | 0.421594 | 0.351879 | NA       | 0.000109 | 0.999804 | NA       | 0                  | 0        | 0        | 0        | 1        | 0        | 0        | 0        | 0        |          |          |          |
| Col7a1   | 0.829486 | 0.004379 | 0.018278 | 0.682067 | 0.019145 | 0.056802 | 336                | 223      | 384      | 562      | 430      | 577      | 447      | 415      | 659      |          |          |          |
| Col8a1   | 0.968036 | 0.000102 | 0.000786 | 0.936309 | 0.000159 | 0.001017 | 39                 | 38       | 30       | 65       | 70       | 60       | 59       | 63       | 85       |          |          |          |
| Col8a2   | -0.36364 | 0.675884 | NA       | -0.41646 | 0.631878 | NA       | 2                  | 1        | 2        | 2        | 1        | 0        | 2        | 0        | 1        |          |          |          |
| Col9a1   | NA       | NA       | NA       | NA       | NA       | NA       | 0                  | 0        | 0        | 0        | 0        | 0        | 0        | 0        | 0        |          |          |          |
| Col9a2   | 0.672602 | 0.384395 | NA       | -0.4569  | 0.537239 | NA       | 0                  | 0        | 1        | 0        | 2        | 1        | 0        | 0        | 0        |          |          |          |
| Col9a3   | 0.200064 | 0.74867  | NA       | 0.50452  | 0.406033 | NA       | 4                  | 3        | 5        | 3        | 6        | 4        | 6        | 6        | 6        |          |          |          |
| Col10a1  | 0.745259 | 0.270492 | NA       | 0.413016 | 0.537771 | NA       | 0                  | 0        | 0        | 2        | 0        | 0        | 1        | 0        | 0        |          |          |          |
| Col11a1  | 1.132016 | 0.071311 | NA       | 1.424773 | 0.020579 | NA       | 2                  | 3        | 3        | 5        | 7        | 7        | 6        | 12       | 8        |          |          |          |
| Col11a2  | -0.27371 | 0.408348 | 0.569186 | -0.46562 | 0.162588 | 0.297879 | 25                 | 27       | 26       | 22       | 16       | 21       | 17       | 25       | 14       |          |          |          |
| Col12a1  | -0.05517 | 0.850216 | 0.907857 | -0.0724  | 0.803088 | 0.881337 | 49                 | 48       | 37       | 35       | 34       | 50       | 22       | 47       | 59       |          |          |          |
| Col13a1  | 0.003215 | 0.993782 | NA       | 0.359147 | 0.397855 | NA       | 0                  | 0        | 0        | 0        | 0        | 0        | 0        | 1        | 0        |          |          |          |
| Col14a1  | -0.12439 | 0.878328 | NA       | -0.20902 | 0.79673  | NA       | 1                  | 2        | 2        | 1        | 2        | 1        | 0        | 1        | 3        |          |          |          |
| Col15a1  | 1.297059 | 0.000283 | 0.001857 | 1.521421 | 1.61E-05 | 0.000138 | 28                 | 5        | 16       | 40       | 43       | 32       | 39       | 60       | 49       |          |          |          |
| Col16a1  | 1.38897  | 7.29E-07 | 1.03E-05 | 1.620727 | 4.94E-09 | 9.22E-08 | 21                 | 38       | 30       | 57       | 79       | 85       | 56       | 120      | 109      |          |          |          |
| Col17a1  | -0.09078 | 0.91364  | NA       | -0.51593 | 0.540526 | NA       | 1                  | 2        | 4        | 2        | 0        | 4        | 2        | 1        | 1        |          |          |          |
| Col18a1  | 0.160285 | 0.010168 | 0.036336 | 0.152742 | 0.01427  | 0.044695 | 11749              | 11481    | 12154    | 11385    | 11448    | 13637    | 12204    | 14244    | 12890    |          |          |          |
| Col19a1  | NA       | NA       | NA       | NA       | NA       | NA       | 0                  | 0        | 0        | 0        | 0        | 0        | 0        | 0        | 0        |          |          |          |
| Col20a1  | -0.23053 | 0.271841 | 0.431818 | -0.65015 | 0.002715 | 0.011386 | 65                 | 66       | 62       | 54       | 47       | 50       | 38       | 42       | 42       |          |          |          |
| Col22a1  | NA       | NA       | NA       | NA       | NA       | NA       | 0                  | 0        | 0        | 0        | 0        | 0        | 0        | 0        | 0        |          |          |          |
| Col23a1  | 0.034988 | 0.967894 | NA       | 0.005451 | 0.995001 | NA       | 1                  | 1        | 0        | 0        | 0        | 2        | 0        | 0        | 2        |          |          |          |
| Col24a1  | 0.67632  | 0.219197 | NA       | 0.68377  | 0.210801 | 0.360879 | 3                  | 7        | 6        | 11       | 7        | 7        | 12       | 5        | 10       |          |          |          |
| Col25a1  | 0.003215 | 0.993782 | NA       | 0.359147 | 0.397855 | NA       | 0                  | 0        | 0        | 0        | 0        | 0        | 0        | 1        | 0        |          |          |          |
| Col26a1  | 0.947476 | 0.277441 | NA       | 0.876831 | 0.314868 | NA       | 1                  | 0        | 0        | 1        | 2        | 1        | 2        | 2        | 0        |          |          |          |
| Col27a1  | -0.05436 | 0.570746 | 0.707291 | -0.08741 | 0.36151  | 0.530112 | 2974               | 2630     | 2634     | 2654     | 2109     | 2534     | 2561     | 2517     | 2635     |          |          |          |
| Col28a1  | -0.78436 | 0.260309 | NA       | -0.3594  | 0.617    | NA       | 1                  | 0        | 1        | 0        | 0        | 0        | 0        | 1        | 0        |          |          |          |

**Appendix Table S4 - Clinical information data provided by US Biomax for  
Pancreas cancer tissue array (PA961c).**

| catalognum | position | sex | age | organ    | pathology                         | grade | stage | tnm     | type      |
|------------|----------|-----|-----|----------|-----------------------------------|-------|-------|---------|-----------|
| PA961c     | A1       | F   | 67  | Pancreas | Duct adenocarcinoma               | 1     | III   | T3N1bM0 | Malignant |
| PA961c     | A2       | F   | 48  | Pancreas | Duct adenocarcinoma               | 1     | IIA   | T3N0M0  | Malignant |
| PA961c     | A3       | F   | 47  | Pancreas | Duct adenocarcinoma               | 1     | IIA   | T3N0M0  | Malignant |
| PA961c     | A4       | M   | 59  | Pancreas | Duct adenocarcinoma               | 1     | IIB   | T2N1M0  | Malignant |
| PA961c     | A5       | F   | 44  | Pancreas | Adenocarcinoma (sparse)           | -     | IIB   | T3N1M0  | Malignant |
| PA961c     | A6       | M   | 34  | Pancreas | Duct adenocarcinoma               | 1     | IIA   | T3N0M0  | Malignant |
| PA961c     | A7       | M   | 49  | Pancreas | Duct adenocarcinoma               | 1     | IB    | T2N0M0  | Malignant |
| PA961c     | A8       | M   | 56  | Pancreas | Duct adenocarcinoma               | 1     | IB    | T2N0M0  | Malignant |
| PA961c     | A9       | M   | 49  | Pancreas | Duct adenocarcinoma               | 1     | IB    | T2N0M0  | Malignant |
| PA961c     | A10      | M   | 67  | Pancreas | Duct adenocarcinoma               | 1     | IB    | T2N0M0  | Malignant |
| PA961c     | A11      | M   | 48  | Pancreas | Duct adenocarcinoma               | 1     | IB    | T2N0M0  | Malignant |
| PA961c     | A12      | F   | 56  | Pancreas | Duct adenocarcinoma               | -     | IB    | T2N0M0  | Malignant |
| PA961c     | B1       | F   | 58  | Pancreas | Duct adenocarcinoma               | 1     | IIB   | T2N1M0  | Malignant |
| PA961c     | B2       | M   | 52  | Pancreas | Duct adenocarcinoma               | 1     | IIB   | T3N1M0  | Malignant |
| PA961c     | B3       | F   | 51  | Pancreas | Duct adenocarcinoma               | -     | IIA   | T3N0M0  | Malignant |
| PA961c     | B4       | M   | 55  | Pancreas | Duct adenocarcinoma               | 1     | IIA   | T3N0M0  | Malignant |
| PA961c     | B5       | F   | 62  | Pancreas | Duct adenocarcinoma with necrosis | 2     | III   | T4N0M0  | Malignant |
| PA961c     | B6       | M   | 56  | Pancreas | Duct adenocarcinoma               | 2     | IB    | T2N0M0  | Malignant |
| PA961c     | B7       | M   | 60  | Pancreas | Duct adenocarcinoma               | 2     | IA    | T2N0M0  | Malignant |
| PA961c     | B8       | M   | 52  | Pancreas | Duct adenocarcinoma               | -     | IIA   | T3N0M0  | Malignant |
| PA961c     | B9       | M   | 42  | Pancreas | Hyperplasia of duct epithelium    | -     | IB    | T2N0M0  | Malignant |
| PA961c     | B10      | M   | 54  | Pancreas | Duct adenocarcinoma               | -     | IIA   | T3N0M0  | Malignant |
| PA961c     | B11      | F   | 51  | Pancreas | Duct adenocarcinoma               | 1     | IIA   | T3N0M0  | Malignant |
| PA961c     | B12      | F   | 54  | Pancreas | Duct adenocarcinoma               | 2     | IB    | T2N0M0  | Malignant |
| PA961c     | C1       | M   | 54  | Pancreas | Duct adenocarcinoma               | 2     | IIA   | T3N0M0  | Malignant |
| PA961c     | C2       | M   | 39  | Pancreas | Duct adenocarcinoma               | 2     | IIA   | T3N0M0  | Malignant |
| PA961c     | C3       | F   | 41  | Pancreas | Duct adenocarcinoma               | -     | IIA   | T3N0M0  | Malignant |
| PA961c     | C4       | F   | 68  | Pancreas | Duct adenocarcinoma               | 2     | IIA   | T3N0M0  | Malignant |
| PA961c     | C5       | F   | 44  | Pancreas | Duct adenocarcinoma               | 2     | IIB   | T3N1M0  | Malignant |
| PA961c     | C6       | M   | 42  | Pancreas | Duct adenocarcinoma               | 1     | IIA   | T3N0M0  | Malignant |
| PA961c     | C7       | M   | 53  | Pancreas | Duct adenocarcinoma               | 2     | IB    | T2N0M0  | Malignant |
| PA961c     | C8       | M   | 51  | Pancreas | Duct adenocarcinoma               | 1     | IIA   | T3N0M0  | Malignant |

|        |     |   |    |          |                                         |   |     |         |           |
|--------|-----|---|----|----------|-----------------------------------------|---|-----|---------|-----------|
| PA961c | C9  | M | 48 | Pancreas | Duct adenocarcinoma                     | 1 | IIA | T3N0M0  | Malignant |
| PA961c | C10 | M | 57 | Pancreas | Duct adenocarcinoma                     | - | IIA | T3N0M0  | Malignant |
| PA961c | C11 | F | 64 | Pancreas | Duct adenocarcinoma                     | 1 | IIA | T3N0M0  | Malignant |
| PA961c | C12 | M | 49 | Pancreas | Duct adenocarcinoma                     | 2 | IIA | T3N0M0  | Malignant |
| PA961c | D1  | M | 72 | Pancreas | Duct adenocarcinoma                     | 1 | IIA | T3N0M0  | Malignant |
| PA961c | D2  | F | 72 | Pancreas | Duct adenocarcinoma                     | 2 | IIA | T3N0M0  | Malignant |
| PA961c | D3  | M | 59 | Pancreas | Duct adenocarcinoma                     | 2 | IIA | T3N0M0  | Malignant |
| PA961c | D4  | F | 45 | Pancreas | Duct adenocarcinoma                     | 2 | III | T3N2M0  | Malignant |
| PA961c | D5  | F | 60 | Pancreas | Duct adenocarcinoma                     | 2 | IV  | T2N1M1  | Malignant |
| PA961c | D6  | M | 52 | Pancreas | Chronic inflammation of pancreas tissue | - | IA  | T1N0M0  | Malignant |
| PA961c | D7  | F | 44 | Pancreas | Duct adenocarcinoma with necrosis       | 2 | IB  | T2N0M0  | Malignant |
| PA961c | D8  | F | 46 | Pancreas | Duct adenocarcinoma                     | 2 | IB  | T2N0M0  | Malignant |
| PA961c | D9  | M | 52 | Pancreas | Duct adenocarcinoma                     | 2 | IB  | T2N0M0  | Malignant |
| PA961c | D10 | M | 52 | Pancreas | Duct adenocarcinoma                     | 2 | IB  | T2N0M0  | Malignant |
| PA961c | D11 | F | 53 | Pancreas | Duct adenocarcinoma                     | 2 | IIB | T2N1M0  | Malignant |
| PA961c | D12 | M | 40 | Pancreas | Duct adenocarcinoma                     | 1 | IIB | T3N1bM0 | Malignant |
| PA961c | E1  | M | 57 | Pancreas | Duct adenocarcinoma                     | 1 | IIA | T3N0M0  | Malignant |
| PA961c | E2  | M | 31 | Pancreas | Duct adenocarcinoma                     | 1 | IIA | T3N0M0  | Malignant |
| PA961c | E3  | M | 44 | Pancreas | Duct adenocarcinoma                     | 2 | IIA | T3N0M0  | Malignant |
| PA961c | E4  | M | 61 | Pancreas | Adenocarcinoma                          | 3 | IV  | T3N0M1  | Malignant |
| PA961c | E5  | M | 51 | Pancreas | Duct adenocarcinoma                     | 2 | IIA | T3N0M0  | Malignant |
| PA961c | E6  | M | 59 | Pancreas | Duct adenocarcinoma                     | 2 | IA  | T1N0M0  | Malignant |
| PA961c | E7  | M | 44 | Pancreas | Adenocarcinoma                          | 3 | IIA | T3N0M0  | Malignant |
| PA961c | E8  | M | 45 | Pancreas | Adenocarcinoma                          | 3 | IIB | T2N1M0  | Malignant |
| PA961c | E9  | M | 41 | Pancreas | Duct adenocarcinoma                     | 2 | IB  | T2N0M0  | Malignant |
| PA961c | E10 | F | 72 | Pancreas | Duct adenocarcinoma                     | 2 | IIA | T3N0M0  | Malignant |
| PA961c | E11 | F | 51 | Pancreas | Duct adenocarcinoma                     | - | IIA | T3N0M0  | Malignant |
| PA961c | E12 | F | 42 | Pancreas | Duct adenocarcinoma                     | 2 | IB  | T2N0M0  | Malignant |
| PA961c | F1  | F | 39 | Pancreas | Duct adenocarcinoma                     | 2 | IIA | T3N0M0  | Malignant |
| PA961c | F2  | F | 51 | Pancreas | Duct adenocarcinoma with necrosis       | 2 | IIA | T3N0M0  | Malignant |
| PA961c | F3  | M | 62 | Pancreas | Duct adenocarcinoma                     | 1 | IIA | T3N0M0  | Malignant |
| PA961c | F4  | M | 60 | Pancreas | Duct adenocarcinoma                     | 2 | IB  | T2N0M0  | Malignant |
| PA961c | F5  | F | 53 | Pancreas | Duct adenocarcinoma                     | 2 | IIA | T3N0M0  | Malignant |

|        |     |   |    |          |                                                                            |   |     |         |           |
|--------|-----|---|----|----------|----------------------------------------------------------------------------|---|-----|---------|-----------|
| PA961c | F6  | M | 77 | Pancreas | Duct adenocarcinoma                                                        | 2 | IA  | T1N0M0  | Malignant |
| PA961c | F7  | M | 47 | Pancreas | Adenocarcinoma                                                             | 3 | IIA | T3N0M0  | Malignant |
| PA961c | F8  | M | 67 | Pancreas | Adenocarcinoma                                                             | 3 | IIA | T3N0M0  | Malignant |
| PA961c | F9  | M | 78 | Pancreas | Adenocarcinoma                                                             | 3 | IB  | T2N0M0  | Malignant |
| PA961c | F10 | M | 62 | Pancreas | Adenocarcinoma                                                             | 3 | IIA | T3N0M0  | Malignant |
| PA961c | F11 | M | 50 | Pancreas | Adenocarcinoma                                                             | 3 | IB  | T2N0M0  | Malignant |
| PA961c | F12 | M | 55 | Pancreas | Adenocarcinoma                                                             | 3 | IIB | T3N1M0  | Malignant |
| PA961c | G1  | F | 48 | Pancreas | Adenocarcinoma                                                             | 3 | IIA | T3N0M0  | Malignant |
| PA961c | G2  | M | 50 | Pancreas | Adenocarcinoma                                                             | 3 | IIB | T3N1M0  | Malignant |
| PA961c | G3  | F | 53 | Pancreas | Adenocarcinoma with necrosis                                               | 3 | IB  | T2N0M0  | Malignant |
| PA961c | G4  | M | 50 | Pancreas | Adenocarcinoma                                                             | 3 | IB  | T2N0M0  | Malignant |
| PA961c | G5  | F | 23 | Pancreas | Adenocarcinoma                                                             | 3 | IB  | T2N0M0  | Malignant |
| PA961c | G6  | M | 56 | Pancreas | Adenocarcinoma                                                             | - | IIB | T2N1bM0 | Malignant |
| PA961c | G7  | F | 56 | Pancreas | Undifferentiated carcinoma                                                 | - | IIA | T3N0M0  | Malignant |
| PA961c | G8  | F | 54 | Pancreas | Mixed acinar-neuroendocrine carcinoma                                      | - | IB  | T2N0M0  | Malignant |
| PA961c | G9  | M | 52 | Pancreas | Adenosquamous carcinoma                                                    | - | IIA | T3N0M0  | Malignant |
| PA961c | G10 | F | 49 | Pancreas | Adenosquamous carcinoma                                                    | - | IIB | T3N1M0  | Malignant |
| PA961c | G11 | M | 50 | Pancreas | Adenosquamous carcinoma                                                    | - | IIA | T3N0M0  | Malignant |
| PA961c | G12 | M | 62 | Pancreas | Squamous cell carcinoma                                                    | 2 | IIA | T3N0M0  | Malignant |
| PA961c | H1  | F | 52 | Pancreas | Carcinoid                                                                  | - | IIA | T3N0M0  | Malignant |
| PA961c | H2  | F | 50 | Pancreas | Carcinoid                                                                  | - | IIA | T3N0M0  | Malignant |
| PA961c | H3  | M | 51 | Pancreas | Atypical carcinoid                                                         | - | III | T4N0M0  | Malignant |
| PA961c | H4  | M | 42 | Pancreas | Neuroendocrine carcinoma                                                   | - | IIA | T3N0M0  | Malignant |
| PA961c | H5  | M | 53 | Pancreas | Acinic cell carcinoma                                                      | - | IB  | T2N0M0  | Malignant |
| PA961c | H6  | F | 33 | Pancreas | Solid pseudo-papillary carcinoma (chronic inflammation of pancreas tissue) | - | IIA | T3N0M0  | Malignant |
| PA961c | H7  | M | 42 | Pancreas | Solid pseudo-papillary carcinoma                                           | - | IB  | T2N0M0  | Malignant |
| PA961c | H8  | F | 21 | Pancreas | Pancreatic tissue                                                          | - | -   | -       | Normal    |
| PA961c | H9  | M | 47 | Pancreas | Pancreatic tissue                                                          | - | -   | -       | Normal    |
| PA961c | H10 | M | 38 | Pancreas | Pancreatic tissue                                                          | - | -   | -       | Normal    |
| PA961c | H11 | M | 40 | Pancreas | Pancreatic tissue                                                          | - | -   | -       | Normal    |
| PA961c | H12 | F | 38 | Pancreas | Pancreatic tissue                                                          | - | -   | -       | Normal    |

## **Appendix References**

Pinho AV, Rooman I, Reichert M, De Medts N, Bouwens L, Rustgi AK, Real FX (2011) Adult pancreatic acinar cells dedifferentiate to an embryonic progenitor phenotype with concomitant activation of a senescence programme that is present in chronic pancreatitis. *Gut* **60**: 958-966
