# Supplementary material for: ROCK signaling promotes collagen remodeling to facilitate invasive pancreatic ductal adenocarcinoma tumor cell growth
Source: PubMed Central journal article supplement (PMC5286371; doi:10.15252/emmm.201606743), 2016-12-28

# Source Data for Figure 5

**B**

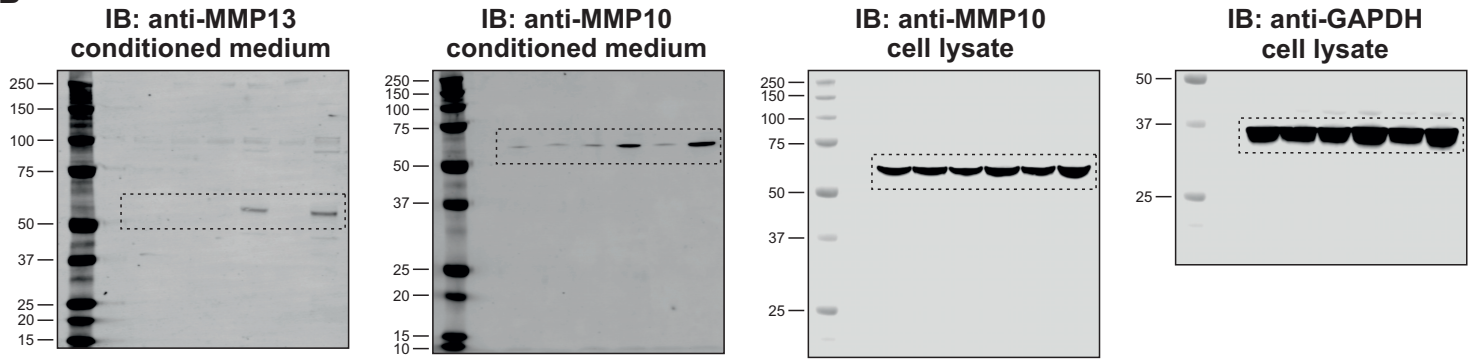

**D**

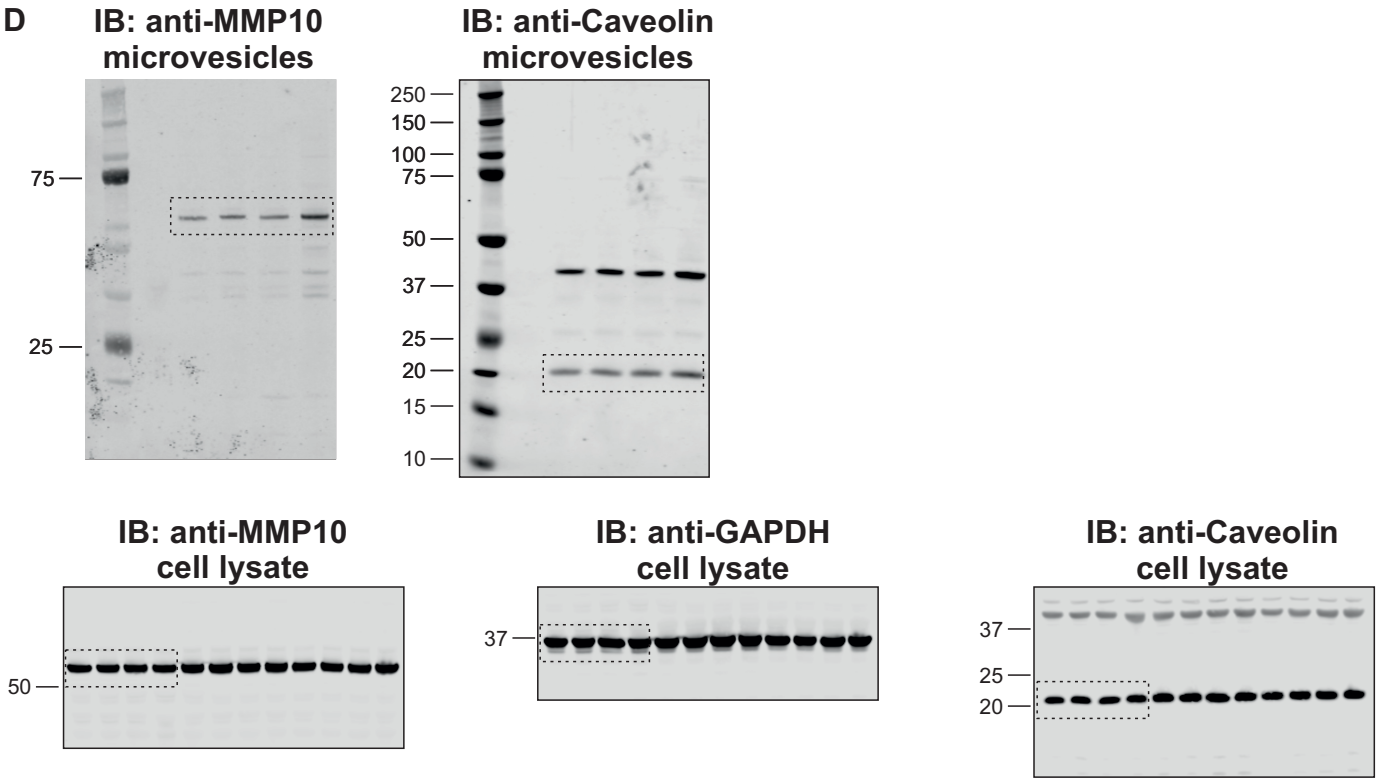

Supplement: EMMM-9-198-s005.pdf [file EMMM-9-198-s005.pdf]
