# Supplementary material for: ROCK signaling promotes collagen remodeling to facilitate invasive pancreatic ductal adenocarcinoma tumor cell growth
Source: EMBO Mol Med. 2016 Dec 28;9(2):198–218. doi: 10.15252/emmm.201606743 (PMC5286371; doi:10.15252/emmm.201606743)
Supplement: Supplementary file 2 — Expanded View Figures PDF [file EMMM-9-198-s002.pdf]

## Expanded View Figures

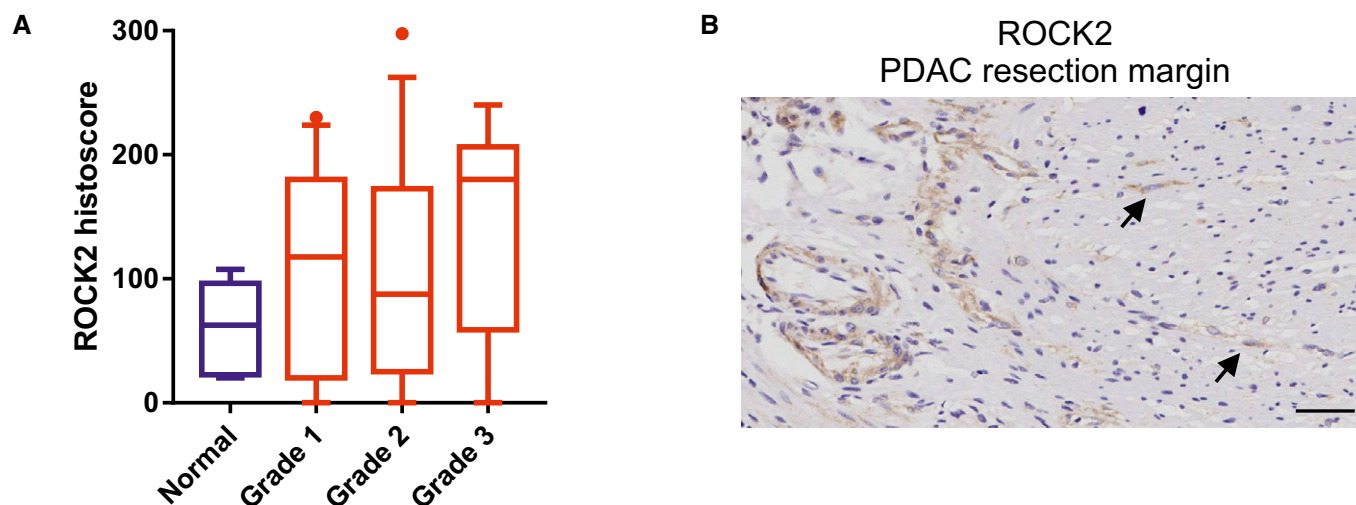

**Figure EV1. ROCK2 association with pancreas adenocarcinoma grade and expression in tumor cells in resection margin (related to Fig 1).**

**A** Histoscores of ROCK2 staining (Fig 1A) in normal pancreas ( $n = 5$ ), and pancreas adenocarcinoma grade 1 ( $n = 23$ ), grade 2 ( $n = 27$ ), and grade 3 ( $n = 13$ ). Box (upper and lower quartiles divided by median value) and whisker (5<sup>th</sup>–95<sup>th</sup> percentile) plots show outliers as individual points.

**B** ROCK2-positive stained cells (indicated with arrows) found beyond the tumor in the resection margin of human PDAC.

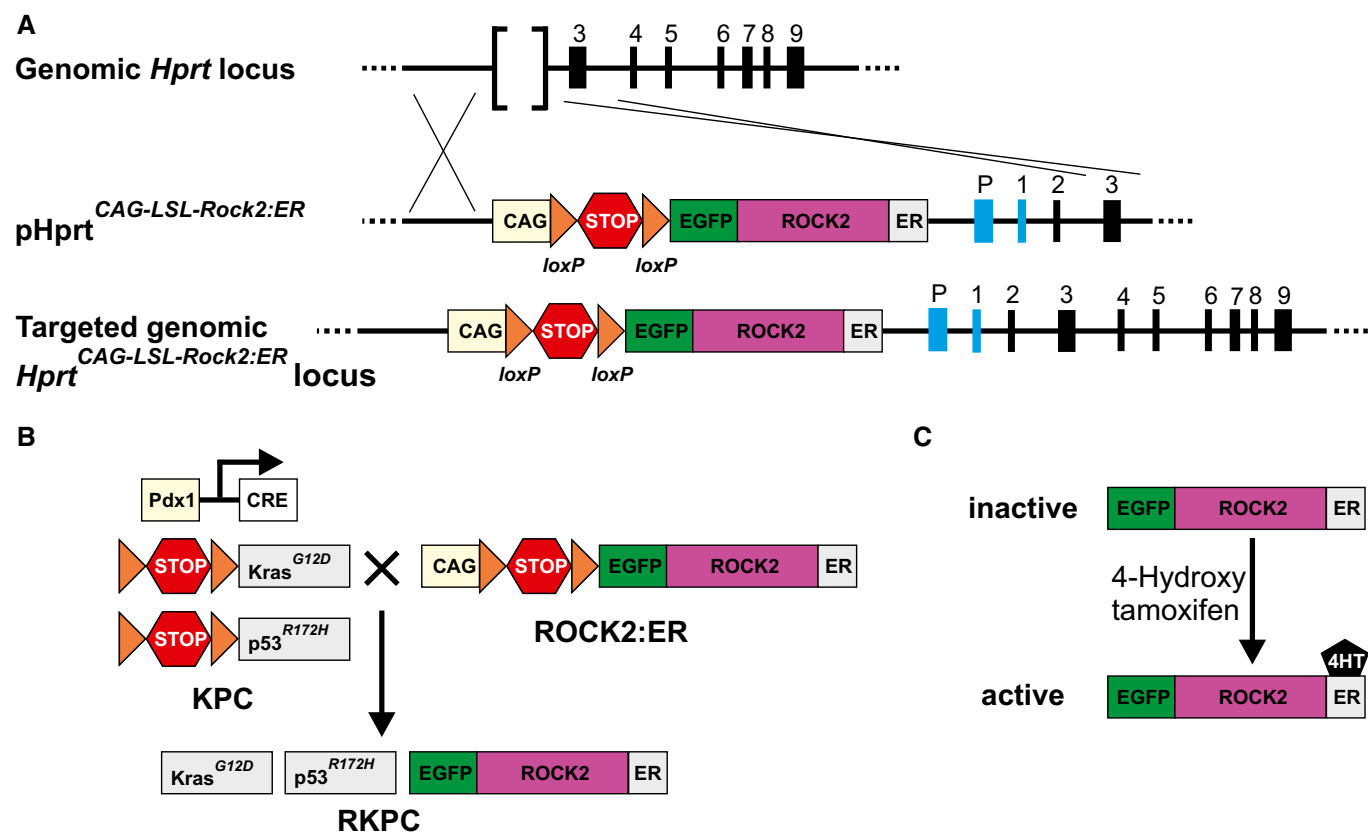

**Figure EV2. Tissue-selective expression of conditionally activated ROCK2 (related to Fig 1).**

- A A CAG-LSL-*Rock2:ER* expression cassette was targeted to the mutant mouse *Hprt* gene locus together with the promoter and first exon of human *HPRT* and the second exon of murine *Hprt* to reconstitute an active chimeric *Hprt* locus. Not to scale.
- B Generation of LSL-ROCK2:ER; KPC (RKPC) mice.
- C Conditional activation of the ROCK2:ER fusion protein.

**Figure EV3. ROCK-induced collagen matrix invasion (related to Fig 2).**

- A H&E-stained sections of cell invasion into collagen matrix containing embedded fibroblasts after 8 days. Scale bar = 100  $\mu$ m. Invasion index of KPfC cells treated with 1  $\mu$ M 4HT. Means  $\pm$  SEM ( $n = 6$ ), one-way ANOVA with multiplicity adjusted exact *P*-value by *post hoc* Dunnett's multiple comparison test.
- B H&E-stained sections of cell invasion into collagen matrix after 8 days. Scale bar = 100  $\mu$ m. Invasion index of KPfC cells treated with EtOH vehicle, 1  $\mu$ M 4HT, or 1  $\mu$ M 4HT + 10  $\mu$ M H1152. Means  $\pm$  SEM ( $n = 6$ ;  $n = 5$  for ROCK2:ER/4HT), one-way ANOVA with multiplicity adjusted exact *P*-value by *post hoc* Tukey multiple comparison test.
- C Cell proliferation determined by Ki67 immunofluorescence. Scale bar = 20  $\mu$ m.
- D Quantification of cell number at the collagen matrix surface per 0.046 mm<sup>2</sup> field. Means  $\pm$  SEM ( $n = 24$ ), one-way ANOVA with multiplicity adjusted exact *P*-value by *post hoc* Tukey multiple comparison test.
- E Ki67-positive cell percentages at the surface. Means  $\pm$  SEM ( $n = 24$ ), one-way ANOVA with multiplicity adjusted exact *P*-value by *post hoc* Tukey multiple comparison test.

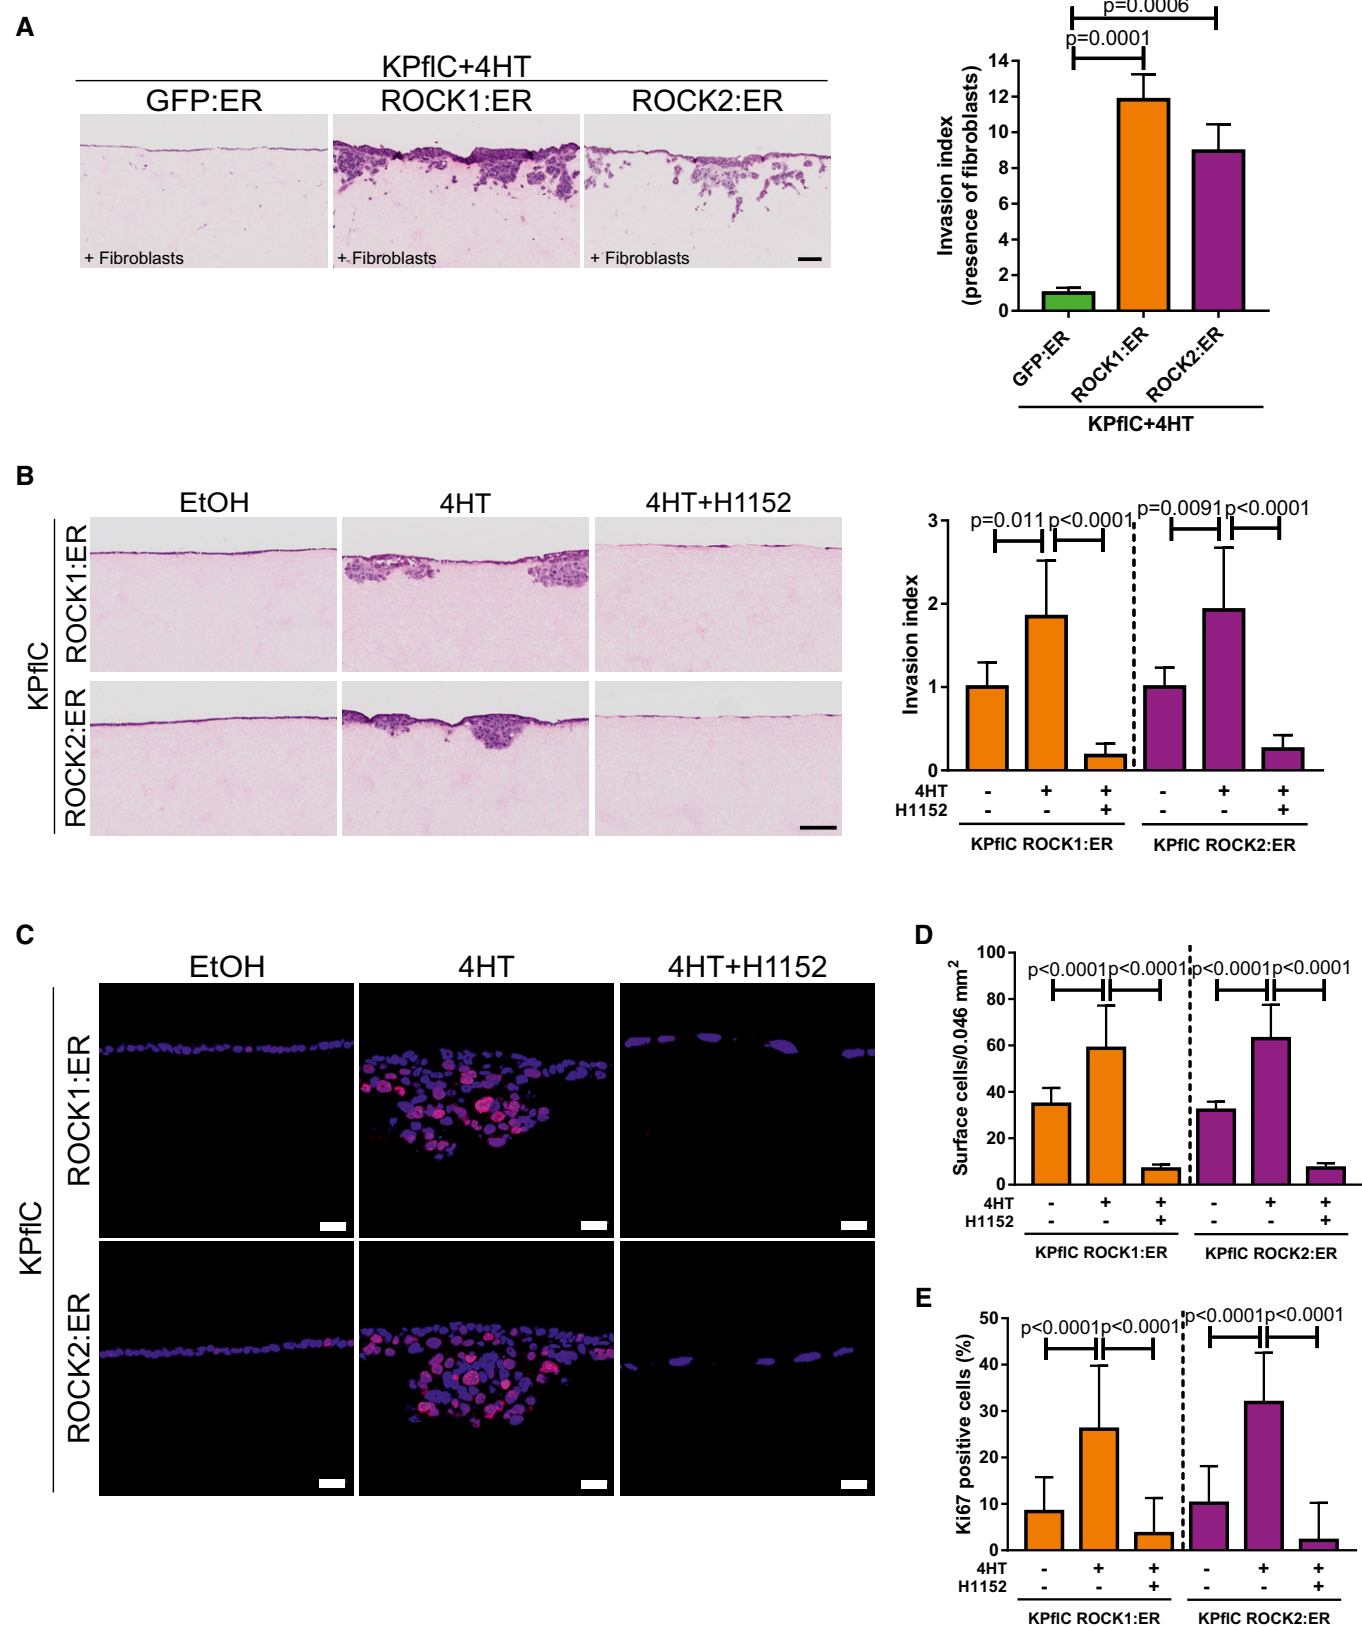

Figure EV3.

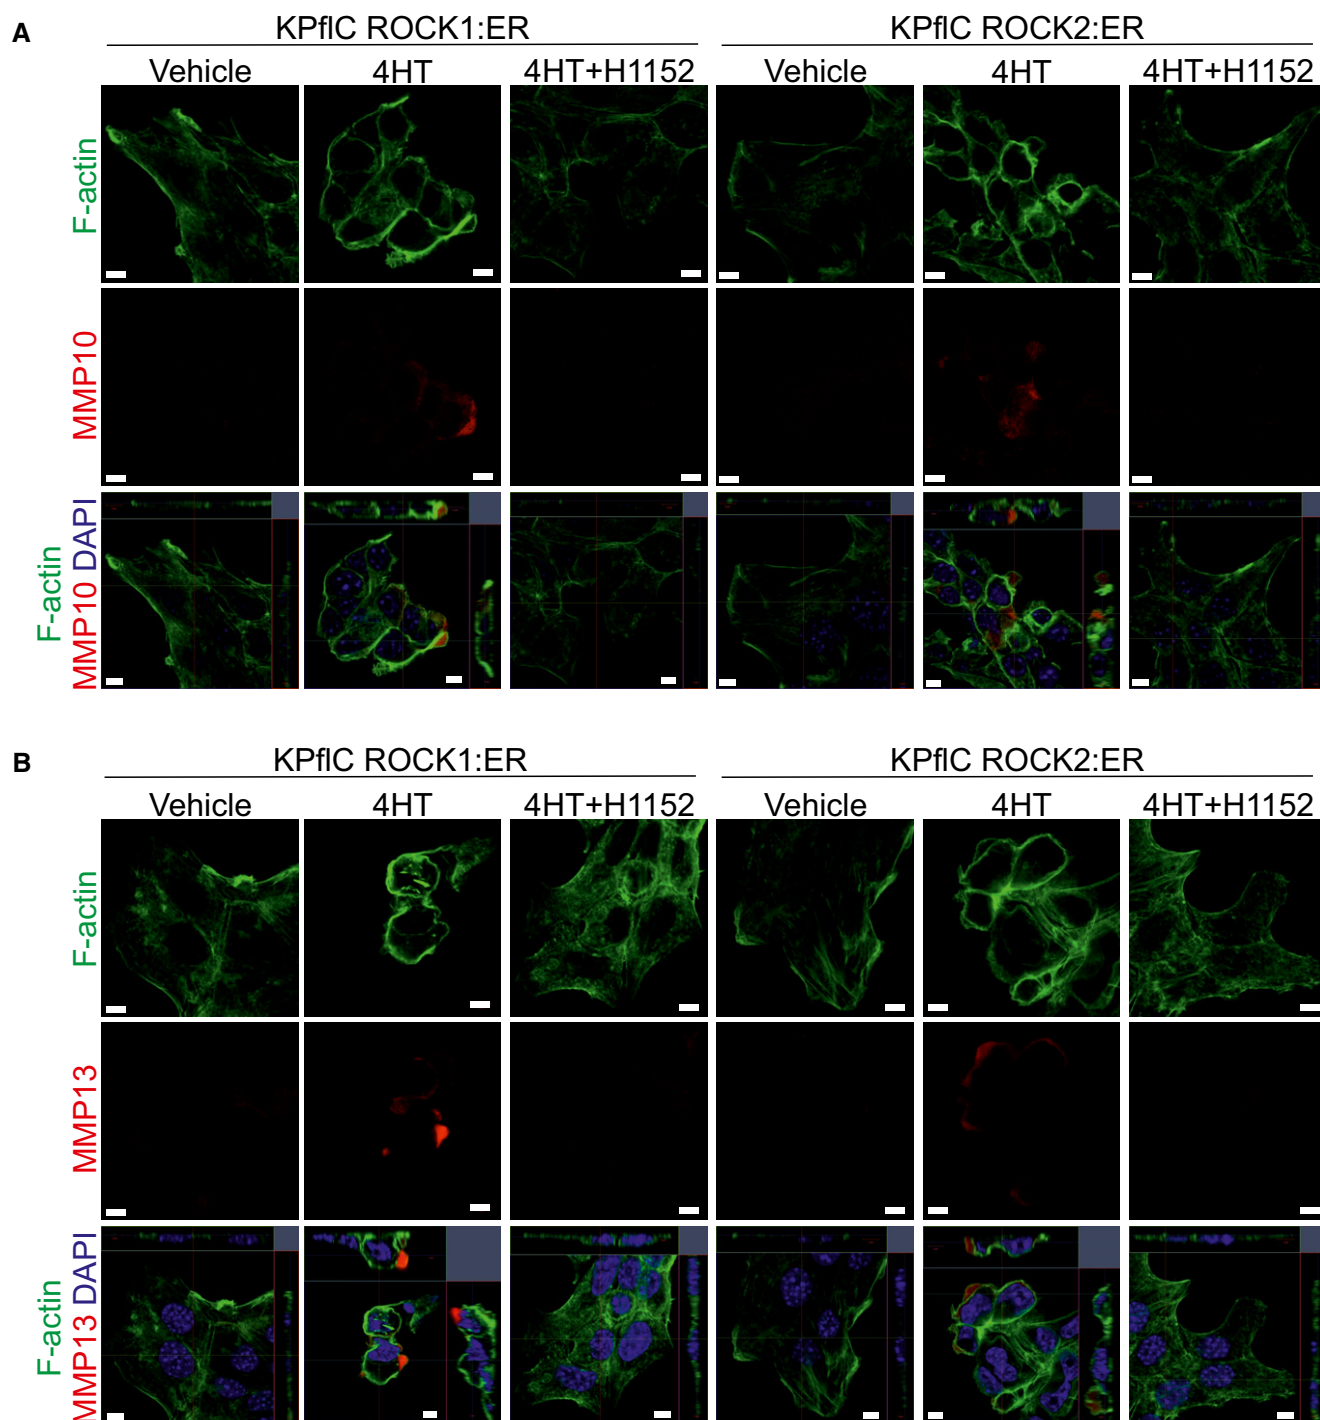

**Figure EV4. Accumulation of MMP10 and MMP13 in bleblike protrusions (related to Fig 5).**

A, B Confocal microscope images of KPflC cells expressing ROCK1:ER or ROCK2:ER as indicated co-stained for F-actin, MMP10 (A) or MMP13 (B), and DAPI following treatment with vehicle, 1  $\mu$ M 4HT, or 1  $\mu$ M 4HT + 1  $\mu$ M H1152 for 24 h. Multiple z-planes were used to generate x–z and y–z images (bottom). Scale bar = 5  $\mu$ m.
